# Supplementary material for: Electroacupuncture Reduces Visceral Pain Via Cannabinoid CB2 Receptors in a Mouse Model of Inflammatory Bowel Disease
Source: Front Pharmacol. 2022 Mar 25;13:861799. doi: 10.3389/fphar.2022.861799 (PMC8990228; doi:10.3389/fphar.2022.861799)
Supplement: Supplementary file 1 [file Table2.XLSX]

## Sheet: AM630 mechanical allodynia
	Time(Day)	Control+DMSO						TNBS+DMSO						mechanical						TNBS+AM630+EA
	0	1.14	0.82	0.98	1.14	1.14	0.98	1.14	0.82	0.98	1.14	1.14	0.98	1.14	1.14	0.98	1.14	1.14	0.98	1.14	0.82	0.98	1.14	1.14	0.98
	1	1.14	0.98	0.82	0.98	1.14	1.14	0.98	0.73	0.82	0.98	0.93	0.93	0.98	0.93	0.82	0.93	0.93	0.82	0.98	0.73	0.82	0.93	0.93	0.82
	2	1.14	0.82	0.98	1.14	0.98	0.98	0.73	0.54	0.54	0.73	0.54	0.73	0.73	0.73	0.73	0.93	0.54	0.54	0.53	0.53	0.54	0.93	0.73	0.73
	3	0.98	0.98	0.82	0.98	1.14	1.14	0.53	0.54	0.31	0.53	0.31	0.54	0.73	0.54	0.54	0.73	0.31	0.31	0.31	0.31	0.31	0.53	0.54	0.54
	4	1.14	0.82	0.98	1.14	1.14	0.98	0.31	0.31	0.13	0.53	0.31	0.31	0.54	0.73	0.54	0.73	0.54	0.54	0.13	0.31	0.13	0.53	0.31	0.31
	5	1.14	0.98	0.82	0.98	0.98	1.14	0.13	0.13	0.13	0.31	0.13	0.31	0.73	0.73	0.73	0.73	0.54	0.54	0.13	0.13	0.13	0.31	0.13	0.31
	6	1.14	0.82	0.98	0.82	1.14	0.98	0.05	0.13	0.08	0.31	0.05	0.13	0.98	0.98	0.73	0.93	0.73	0.73	0.05	0.05	0.08	0.13	0.13	0.13
	7	1.14	0.98	0.82	0.82	1.14	1.14	0.05	0.05	0.08	0.31	0.02	0.13	0.98	1.14	0.93	0.93	0.73	0.82	0.05	0.05	0.08	0.13	0.13	0.13
		Parameter
		Table Analyzed	AM630 mechanical allodynia
		Two-way RM ANOVA	Matching by cols
		Source of Variation	% of total variation	P value
		Interaction	20.45	< 0.0001
		Time	28.72	< 0.0001
		Column Factor	41.55	< 0.0001
		Subjects (matching)	5.1932	< 0.0001
		Source of Variation	P value summary	Significant?
		Interaction	***	Yes
		Time	***	Yes
		Column Factor	***	Yes
		Subjects (matching)	***	Yes
		Source of Variation	Df	Sum-of-squares	Mean square	F
		Interaction	21	5.083	0.242	33.31
		Time	7	7.138	1.02	140.3
		Column Factor	3	10.33	3.442	53.34
		Subjects (matching)	20	1.291	0.06454	8.882
		Residual	140	1.017	0.007267
		Number of missing values	0
		Bonferroni posttests
		Control+DMSO vs TNBS+DMSO
		Column Factor	Control+DMSO	TNBS+DMSO	Difference	95% CI of diff.
		0	1.033	1.033	0	-0.2316 to 0.2316
		1	1.033	0.895	-0.1383	-0.3700 to 0.09329
		2	1.007	0.635	-0.3717	-0.6033 to -0.1400
		3	1.007	0.46	-0.5467	-0.7783 to -0.3150
		4	1.033	0.3167	-0.7167	-0.9483 to -0.4850
		5	1.007	0.19	-0.8167	-1.048 to -0.5850
		6	0.98	0.125	-0.855	-1.087 to -0.6234
		7	1.007	0.1067	-0.9	-1.132 to -0.6684
		Column Factor	Difference	t	P value	Summary
		0	0	0	P > 0.05	ns
		1	-0.1383	1.995	P > 0.05	ns
		2	-0.3717	5.36	P<0.001	***
		3	-0.5467	7.883	P<0.001	***
		4	-0.7167	10.33	P<0.001	***
		5	-0.8167	11.78	P<0.001	***
		6	-0.855	12.33	P<0.001	***
		7	-0.9	12.98	P<0.001	***
		Control+DMSO vs mechanical
		Column Factor	Control+DMSO	mechanical	Difference	95% CI of diff.
		0	1.033	1.087	0.05333	-0.1783 to 0.2850
		1	1.033	0.9017	-0.1317	-0.3633 to 0.09996
		2	1.007	0.7	-0.3067	-0.5383 to -0.07504
		3	1.007	0.5267	-0.48	-0.7116 to -0.2484
		4	1.033	0.6033	-0.43	-0.6616 to -0.1984
		5	1.007	0.6667	-0.34	-0.5716 to -0.1084
		6	0.98	0.8467	-0.1333	-0.3650 to 0.09829
		7	1.007	0.9217	-0.085	-0.3166 to 0.1466
		Column Factor	Difference	t	P value	Summary
		0	0.05333	0.7691	P > 0.05	ns
		1	-0.1317	1.899	P > 0.05	ns
		2	-0.3067	4.422	P<0.001	***
		3	-0.48	6.922	P<0.001	***
		4	-0.43	6.201	P<0.001	***
		5	-0.34	4.903	P<0.001	***
		6	-0.1333	1.923	P > 0.05	ns
		7	-0.085	1.226	P > 0.05	ns
		Control+DMSO vs TNBS+AM630+EA
		Column Factor	Control+DMSO	TNBS+AM630+EA	Difference	95% CI of diff.
		0	1.033	1.033	0	-0.2316 to 0.2316
		1	1.033	0.8683	-0.165	-0.3966 to 0.06663
		2	1.007	0.665	-0.3417	-0.5733 to -0.1100
		3	1.007	0.4233	-0.5833	-0.8150 to -0.3517
		4	1.033	0.2867	-0.7467	-0.9783 to -0.5150
		5	1.007	0.19	-0.8167	-1.048 to -0.5850
		6	0.98	0.095	-0.885	-1.117 to -0.6534
		7	1.007	0.095	-0.9117	-1.143 to -0.6800
		Column Factor	Difference	t	P value	Summary
		0	0	0	P > 0.05	ns
		1	-0.165	2.379	P > 0.05	ns
		2	-0.3417	4.927	P<0.001	***
		3	-0.5833	8.412	P<0.001	***
		4	-0.7467	10.77	P<0.001	***
		5	-0.8167	11.78	P<0.001	***
		6	-0.885	12.76	P<0.001	***
		7	-0.9117	13.15	P<0.001	***
		TNBS+DMSO vs mechanical
		Column Factor	TNBS+DMSO	mechanical	Difference	95% CI of diff.
		0	1.033	1.087	0.05333	-0.1783 to 0.2850
		1	0.895	0.9017	0.006667	-0.2250 to 0.2383
		2	0.635	0.7	0.065	-0.1666 to 0.2966
		3	0.46	0.5267	0.06667	-0.1650 to 0.2983
		4	0.3167	0.6033	0.2867	0.05504 to 0.5183
		5	0.19	0.6667	0.4767	0.2450 to 0.7083
		6	0.125	0.8467	0.7217	0.4900 to 0.9533
		7	0.1067	0.9217	0.815	0.5834 to 1.047
		Column Factor	Difference	t	P value	Summary
		0	0.05333	0.7691	P > 0.05	ns
		1	0.006667	0.09614	P > 0.05	ns
		2	0.065	0.9374	P > 0.05	ns
		3	0.06667	0.9614	P > 0.05	ns
		4	0.2867	4.134	P<0.001	***
		5	0.4767	6.874	P<0.001	***
		6	0.7217	10.41	P<0.001	***
		7	0.815	11.75	P<0.001	***
		TNBS+DMSO vs TNBS+AM630+EA
		Column Factor	TNBS+DMSO	TNBS+AM630+EA	Difference	95% CI of diff.
		0	1.033	1.033	0	-0.2316 to 0.2316
		1	0.895	0.8683	-0.02667	-0.2583 to 0.2050
		2	0.635	0.665	0.03	-0.2016 to 0.2616
		3	0.46	0.4233	-0.03667	-0.2683 to 0.1950
		4	0.3167	0.2867	-0.03	-0.2616 to 0.2016
		5	0.19	0.19	0	-0.2316 to 0.2316
		6	0.125	0.095	-0.03	-0.2616 to 0.2016
		7	0.1067	0.095	-0.01167	-0.2433 to 0.2200
		Column Factor	Difference	t	P value	Summary
		0	0	0	P > 0.05	ns
		1	-0.02667	0.3846	P > 0.05	ns
		2	0.03	0.4326	P > 0.05	ns
		3	-0.03667	0.5288	P > 0.05	ns
		4	-0.03	0.4326	P > 0.05	ns
		5	0	0	P > 0.05	ns
		6	-0.03	0.4326	P > 0.05	ns
		7	-0.01167	0.1682	P > 0.05	ns
		mechanical vs TNBS+AM630+EA
		Column Factor	mechanical	TNBS+AM630+EA	Difference	95% CI of diff.
		0	1.087	1.033	-0.05333	-0.2850 to 0.1783
		1	0.9017	0.8683	-0.03333	-0.2650 to 0.1983
		2	0.7	0.665	-0.035	-0.2666 to 0.1966
		3	0.5267	0.4233	-0.1033	-0.3350 to 0.1283
		4	0.6033	0.2867	-0.3167	-0.5483 to -0.08504
		5	0.6667	0.19	-0.4767	-0.7083 to -0.2450
		6	0.8467	0.095	-0.7517	-0.9833 to -0.5200
		7	0.9217	0.095	-0.8267	-1.058 to -0.5950
		Column Factor	Difference	t	P value	Summary
		0	-0.05333	0.7691	P > 0.05	ns
		1	-0.03333	0.4807	P > 0.05	ns
		2	-0.035	0.5047	P > 0.05	ns
		3	-0.1033	1.49	P > 0.05	ns
		4	-0.3167	4.567	P<0.001	***
		5	-0.4767	6.874	P<0.001	***
		6	-0.7517	10.84	P<0.001	***
		7	-0.8267	11.92	P<0.001	***

## Sheet: AM630 visceral pain
	Control+DMSO							TNBS+DMSO							EA+DMSO							TNBS+AM630+EA
20	0	0	1	1	1	0	1	1	1	1	1	1	2	2	1	1	0	1	0	1	1	1	2	2	2	1	1	1
40	0	1	1	1	1	1	1	2	2	2	2	2	3	3	2	1	1	2	1	1	2	2	3	2	3	2	2	2
60	1	1	1	2	2	1	2	3	3	2	3	3	3	3	3	2	2	2	1	2	2	3	3	3	4	3	3	3
80	2	1	2	3	2	2	3	4	3	3	3	3	4	4	3	3	2	3	2	3	3	3	4	4	4	3	4	4
		Parameter
		Table Analyzed	AM630 visceral pain
		Two-way RM ANOVA	Matching by cols
		Source of Variation	% of total variation	P value
		Interaction	1.58	0.0635
		Time	49.87	< 0.0001
		Column Factor	28.72	< 0.0001
		Subjects (matching)	13.195	< 0.0001
		Source of Variation	P value summary	Significant?
		Interaction	ns	No
		Time	***	Yes
		Column Factor	***	Yes
		Subjects (matching)	***	Yes
		Source of Variation	Df	Sum-of-squares	Mean square	F
		Interaction	9	1.964	0.2183	1.913
		Time	3	61.82	20.61	180.6
		Column Factor	3	35.61	11.87	17.41
		Subjects (matching)	24	16.36	0.6815	5.974
		Residual	72	8.214	0.1141
		Number of missing values	0
		Bonferroni posttests
		Control+DMSO vs TNBS+DMSO
		Column Factor	Control+DMSO	TNBS+DMSO	Difference	95% CI of diff.
		20	0.5714	1.286	0.7143	-0.1414 to 1.570
		40	0.8571	2.286	1.429	0.5729 to 2.284
		60	1.429	2.857	1.429	0.5729 to 2.284
		80	2.143	3.429	1.286	0.4300 to 2.141
		Column Factor	Difference	t	P value	Summary
		20	0.7143	2.641	P < 0.05	*
		40	1.429	5.283	P<0.001	***
		60	1.429	5.283	P<0.001	***
		80	1.286	4.754	P<0.001	***
		Control+DMSO vs EA+DMSO
		Column Factor	Control+DMSO	EA+DMSO	Difference	95% CI of diff.
		20	0.5714	0.7143	0.1429	-0.7128 to 0.9985
		40	0.8571	1.429	0.5714	-0.2843 to 1.427
		60	1.429	2	0.5714	-0.2843 to 1.427
		80	2.143	2.714	0.5714	-0.2843 to 1.427
		Column Factor	Difference	t	P value	Summary
		20	0.1429	0.5283	P > 0.05	ns
		40	0.5714	2.113	P > 0.05	ns
		60	0.5714	2.113	P > 0.05	ns
		80	0.5714	2.113	P > 0.05	ns
		Control+DMSO vs TNBS+AM630+EA
		Column Factor	Control+DMSO	TNBS+AM630+EA	Difference	95% CI of diff.
		20	0.5714	1.429	0.8571	0.001462 to 1.713
		40	0.8571	2.286	1.429	0.5729 to 2.284
		60	1.429	3.143	1.714	0.8586 to 2.570
		80	2.143	3.714	1.571	0.7157 to 2.427
		Column Factor	Difference	t	P value	Summary
		20	0.8571	3.17	P<0.01	**
		40	1.429	5.283	P<0.001	***
		60	1.714	6.339	P<0.001	***
		80	1.571	5.811	P<0.001	***
		TNBS+DMSO vs EA+DMSO
		Column Factor	TNBS+DMSO	EA+DMSO	Difference	95% CI of diff.
		20	1.286	0.7143	-0.5714	-1.427 to 0.2843
		40	2.286	1.429	-0.8571	-1.713 to -0.001463
		60	2.857	2	-0.8571	-1.713 to -0.001463
		80	3.429	2.714	-0.7143	-1.570 to 0.1414
		Column Factor	Difference	t	P value	Summary
		20	-0.5714	2.113	P > 0.05	ns
		40	-0.8571	3.17	P<0.01	**
		60	-0.8571	3.17	P<0.01	**
		80	-0.7143	2.641	P < 0.05	*
		TNBS+DMSO vs TNBS+AM630+EA
		Column Factor	TNBS+DMSO	TNBS+AM630+EA	Difference	95% CI of diff.
		20	1.286	1.429	0.1429	-0.7128 to 0.9985
		40	2.286	2.286	0	-0.8557 to 0.8557
		60	2.857	3.143	0.2857	-0.5700 to 1.141
		80	3.429	3.714	0.2857	-0.5700 to 1.141
		Column Factor	Difference	t	P value	Summary
		20	0.1429	0.5283	P > 0.05	ns
		40	0	0	P > 0.05	ns
		60	0.2857	1.057	P > 0.05	ns
		80	0.2857	1.057	P > 0.05	ns
		EA+DMSO vs TNBS+AM630+EA
		Column Factor	EA+DMSO	TNBS+AM630+EA	Difference	95% CI of diff.
		20	0.7143	1.429	0.7143	-0.1414 to 1.570
		40	1.429	2.286	0.8571	0.001463 to 1.713
		60	2	3.143	1.143	0.2872 to 1.999
		80	2.714	3.714	1	0.1443 to 1.856
		Column Factor	Difference	t	P value	Summary
		20	0.7143	2.641	P < 0.05	*
		40	0.8571	3.17	P<0.01	**
		60	1.143	4.226	P<0.001	***
		80	1	3.698	P<0.01	**

## Sheet: AM630 IL-1β WB
Control+DMSO	TNBS+DMSO	EA+DMSO	TNBS+AM630+EA
98.1159	173.687	109.675	230.455
101.11	201.078	119.9	239.577
100.774	205.357	89.6911	202.541
			Parameter
			Table Analyzed	AM630 IL-1β WB
			One-way analysis of variance
			P value	< 0.0001
			P value summary	***
			Are means signif. different? (P < 0.05)	Yes
			Number of groups	4
			F	51.37
			R squared	0.9507
			ANOVA Table	SS	df	MS
			Treatment (between columns)	34920	3	11640
			Residual (within columns)	1813	8	226.6
			Total	36740	11
			Tukey's Multiple Comparison Test	Mean Diff.	q	Significant? P < 0.05?	Summary	95% CI of diff
			Control+DMSO vs TNBS+DMSO	-93.37	10.74	Yes	***	-132.7 to -54.01
			Control+DMSO vs EA+DMSO	-6.422	0.7389	No	ns	-45.78 to 32.94
			Control+DMSO vs TNBS+AM630+EA	-124.2	14.29	Yes	***	-163.6 to -84.83
			TNBS+DMSO vs EA+DMSO	86.95	10.01	Yes	***	47.59 to 126.3
			TNBS+DMSO vs TNBS+AM630+EA	-30.82	3.546	No	ns	-70.18 to 8.543
			EA+DMSO vs TNBS+AM630+EA	-117.8	13.55	Yes	***	-157.1 to -78.41

## Sheet: AM630 iNOS WB
	Control+DMSO	TNBS+DMSO	EA+DMSO	TNBS+AM630+EA
	104.938	185.763	113.558	267.869
	87.2817	261.728	107.041	256.234
	107.781	226.927	132.847	233.803
			Parameter
			Table Analyzed	AM630 iNos WB
			One-way analysis of variance
			P value	< 0.0001
			P value summary	***
			Are means signif. different? (P < 0.05)	Yes
			Number of groups	4
			F	33.96
			R squared	0.9272
			ANOVA Table	SS	df	MS
			Treatment (between columns)	52190	3	17400
			Residual (within columns)	4099	8	512.3
			Total	56290	11
			Tukey's Multiple Comparison Test	Mean Diff.	q	Significant? P < 0.05?	Summary	95% CI of diff
			Control+DMSO vs TNBS+DMSO	-124.8	9.55	Yes	***	-184.0 to -65.62
			Control+DMSO vs EA+DMSO	-17.82	1.363	No	ns	-77.00 to 41.37
			Control+DMSO vs TNBS+AM630+EA	-152.6	11.68	Yes	***	-211.8 to -93.45
			TNBS+DMSO vs EA+DMSO	107	8.187	Yes	**	47.80 to 166.2
			TNBS+DMSO vs TNBS+AM630+EA	-27.83	2.13	No	ns	-87.01 to 31.36
			EA+DMSO vs TNBS+AM630+EA	-134.8	10.32	Yes	***	-194.0 to -75.63

## Sheet: AM630 CD68 IF
	Control+DMSO	TNBS+DMSO	EA+DMSO	TNBS+AM630+EA
	82.1429	267.857	89.2857	364.286
	100	328.571	107.857	342.857
	117.857	314.286	164.286	414.286
			Parameter
			Table Analyzed	AM630-cd68 IF
			One-way analysis of variance
			P value	< 0.0001
			P value summary	***
			Are means signif. different? (P < 0.05)	Yes
			Number of groups	4
			F	52.31
			R squared	0.9515
			ANOVA Table	SS	df	MS
			Treatment (between columns)	164600	3	54870
			Residual (within columns)	8391	8	1049
			Total	173000	11
			Tukey's Multiple Comparison Test	Mean Diff.	q	Significant? P < 0.05?	Summary	95% CI of diff
			Control+DMSO vs TNBS+DMSO	-203.6	10.89	Yes	***	-288.3 to -118.9
			Control+DMSO vs EA+DMSO	-20.48	1.095	No	ns	-105.2 to 64.21
			Control+DMSO vs TNBS+AM630+EA	-273.8	14.64	Yes	***	-358.5 to -189.1
			TNBS+DMSO vs EA+DMSO	183.1	9.792	Yes	***	98.41 to 267.8
			TNBS+DMSO vs TNBS+AM630+EA	-70.24	3.756	No	ns	-154.9 to 14.45
			EA+DMSO vs TNBS+AM630+EA	-253.3	13.55	Yes	***	-338.0 to -168.6

## Sheet: AM630 iNOS IF
	Control+DMSO	TNBS+DMSO	EA+DMSO	TNBS+AM630+EA
	71.4286	278.571	92.8571	400
	100	285.714	135.714	414.286
	128.571	321.429	171.429	321.429
				Parameter
				Table Analyzed	AM630 iNos IF
				One-way analysis of variance
				P value	< 0.0001
				P value summary	***
				Are means signif. different? (P < 0.05)	Yes
				Number of groups	4
				F	38.98
				R squared	0.936
				ANOVA Table	SS	df	MS
				Treatment (between columns)	157600	3	52530
				Residual (within columns)	10780	8	1348
				Total	168400	11
				Tukey's Multiple Comparison Test	Mean Diff.	q	Significant? P < 0.05?	Summary	95% CI of diff
				Control+DMSO vs TNBS+DMSO	-195.2	9.211	Yes	***	-291.2 to -99.24
				Control+DMSO vs EA+DMSO	-33.33	1.573	No	ns	-129.3 to 62.66
				Control+DMSO vs TNBS+AM630+EA	-278.6	13.14	Yes	***	-374.6 to -182.6
				TNBS+DMSO vs EA+DMSO	161.9	7.639	Yes	**	65.91 to 257.9
				TNBS+DMSO vs TNBS+AM630+EA	-83.33	3.932	No	ns	-179.3 to 12.66
				EA+DMSO vs TNBS+AM630+EA	-245.2	11.57	Yes	***	-341.2 to -149.2

## Sheet: AM630 HE
							Control+DMSO	TNBS+DMSO	EA+DMSO	TNBS+AM630+EA
							0	8	1	8
							1	7	2	8
							1	8	2	7
							2	9	4	8
			Parameter				1	8	3	8
			Table Analyzed	AM630 HE			0	7	1	9
			One-way analysis of variance
			P value	< 0.0001
			P value summary	***
			Are means signif. different? (P < 0.05)	Yes
			Number of groups	4
			F	116.1
			R squared	0.9457
			Bartlett's test for equal variances
			Bartlett's statistic (corrected)	2.093
			P value	0.5533
			P value summary	ns
			Do the variances differ signif. (P < 0.05)	No
			ANOVA Table	SS	df	MS
			Treatment (between columns)	252.5	3	84.15
			Residual (within columns)	14.5	20	0.725
			Total	267	23
			Tukey's Multiple Comparison Test	Mean Diff.	q	Significant? P < 0.05?	Summary	95% CI of diff
			Control+DMSO vs TNBS+DMSO	-7	20.14	Yes	***	-8.376 to -5.624
			Control+DMSO vs EA+DMSO	-1.333	3.836	No	ns	-2.709 to 0.04251
			Control+DMSO vs TNBS+AM630+EA	-7.167	20.62	Yes	***	-8.543 to -5.791
			TNBS+DMSO vs EA+DMSO	5.667	16.3	Yes	***	4.291 to 7.043
			TNBS+DMSO vs TNBS+AM630+EA	-0.1667	0.4795	No	ns	-1.543 to 1.209
			EA+DMSO vs TNBS+AM630+EA	-5.833	16.78	Yes	***	-7.209 to -4.457
