# Supplementary material for: Electroacupuncture Reduces Visceral Pain Via Cannabinoid CB2 Receptors in a Mouse Model of Inflammatory Bowel Disease
Source: Front Pharmacol. 2022 Mar 25;13:861799. doi: 10.3389/fphar.2022.861799 (PMC8990228; doi:10.3389/fphar.2022.861799)
Supplement: Supplementary file 3 [file Table1.XLSX]

## Sheet: C57 mechanical allodynia
	Time(Day)	Control						TNBS						TNBS+EA						TNBS+shamEA
	0	1.14	0.82	0.98	1.14	1.14	0.98	1.14	0.82	0.98	1.14	1.14	0.98	1.14	0.98	0.98	1.14	1.14	0.98	1.14	0.82	0.98	1.14	1.14	0.98
	1	1.14	0.98	0.82	0.98	1.14	1.14	0.98	0.73	0.82	0.93	0.93	0.93	1.14	0.73	0.93	0.98	0.98	0.98	0.98	0.73	0.73	0.98	0.93	0.93
	2	1.14	0.82	0.98	1.14	0.98	0.98	0.73	0.73	0.73	0.93	0.73	0.73	0.93	0.53	0.73	0.73	0.73	0.73	0.73	0.54	0.54	0.73	0.73	0.73
	3	0.98	0.98	0.82	0.98	1.14	1.14	0.53	0.54	0.31	0.73	0.53	0.53	0.53	0.31	0.54	0.54	0.54	0.54	0.54	0.54	0.54	0.54	0.54	0.31
	4	1.14	0.82	0.98	1.14	1.14	0.98	0.31	0.31	0.13	0.53	0.31	0.31	0.53	0.53	0.54	0.54	0.53	0.54	0.31	0.31	0.13	0.13	0.31	0.13
	5	1.14	0.98	0.82	0.98	0.98	1.14	0.13	0.13	0.13	0.31	0.13	0.13	0.73	0.53	0.93	0.73	0.73	0.73	0.13	0.31	0.13	0.13	0.13	0.05
	6	1.14	0.82	0.98	0.82	1.14	0.98	0.05	0.13	0.08	0.31	0.05	0.05	0.73	0.73	0.93	0.98	0.73	0.98	0.05	0.31	0.08	0.13	0.05	0.05
	7	1.14	0.98	0.82	0.82	1.14	1.14	0.05	0.05	0.08	0.31	0.02	0.02	0.93	0.73	0.93	0.98	0.98	0.98	0.05	0.31	0.05	0.13	0.05	0.08
		Parameter
		Table Analyzed	C57 mechanical allodynia
		Two-way RM ANOVA	Matching by cols
		Source of Variation	% of total variation	P value
		Interaction	22.48	< 0.0001
		Time	29.75	< 0.0001
		Column Factor	39.59	< 0.0001
		Subjects (matching)	3.8447	< 0.0001
		Source of Variation	P value summary	Significant?
		Interaction	***	Yes
		Time	***	Yes
		Column Factor	***	Yes
		Subjects (matching)	***	Yes
		Source of Variation	Df	Sum-of-squares	Mean square	F
		Interaction	21	5.681	0.2705	34.53
		Time	7	7.518	1.074	137.1
		Column Factor	3	10.01	3.336	68.65
		Subjects (matching)	20	0.9717	0.04859	6.202
		Residual	140	1.097	0.007834
		Number of missing values	0
		Bonferroni posttests
		Control vs TNBS
		Column Factor	Control	TNBS	Difference	95% CI of diff.
		0	1.033	1.033	0	-0.2193 to 0.2193
		1	1.033	0.8867	-0.1467	-0.3659 to 0.07260
		2	1.007	0.7633	-0.2433	-0.4626 to -0.02406
		3	1.007	0.5283	-0.4783	-0.6976 to -0.2591
		4	1.033	0.3167	-0.7167	-0.9359 to -0.4974
		5	1.007	0.16	-0.8467	-1.066 to -0.6274
		6	0.98	0.1117	-0.8683	-1.088 to -0.6491
		7	1.007	0.08833	-0.9183	-1.138 to -0.6991
		Column Factor	Difference	t	P value	Summary
		0	0	0	P > 0.05	ns
		1	-0.1467	2.234	P > 0.05	ns
		2	-0.2433	3.707	P<0.01	**
		3	-0.4783	7.287	P<0.001	***
		4	-0.7167	10.92	P<0.001	***
		5	-0.8467	12.9	P<0.001	***
		6	-0.8683	13.23	P<0.001	***
		7	-0.9183	13.99	P<0.001	***
		Control vs TNBS+EA
		Column Factor	Control	TNBS+EA	Difference	95% CI of diff.
		0	1.033	1.06	0.02667	-0.1926 to 0.2459
		1	1.033	0.9567	-0.07667	-0.2959 to 0.1426
		2	1.007	0.73	-0.2767	-0.4959 to -0.05740
		3	1.007	0.5	-0.5067	-0.7259 to -0.2874
		4	1.033	0.535	-0.4983	-0.7176 to -0.2791
		5	1.007	0.73	-0.2767	-0.4959 to -0.05740
		6	0.98	0.8467	-0.1333	-0.3526 to 0.08594
		7	1.007	0.9217	-0.085	-0.3043 to 0.1343
		Column Factor	Difference	t	P value	Summary
		0	0.02667	0.4062	P > 0.05	ns
		1	-0.07667	1.168	P > 0.05	ns
		2	-0.2767	4.215	P<0.001	***
		3	-0.5067	7.718	P<0.001	***
		4	-0.4983	7.591	P<0.001	***
		5	-0.2767	4.215	P<0.001	***
		6	-0.1333	2.031	P > 0.05	ns
		7	-0.085	1.295	P > 0.05	ns
		Control vs TNBS+shamEA
		Column Factor	Control	TNBS+shamEA	Difference	95% CI of diff.
		0	1.033	1.033	0	-0.2193 to 0.2193
		1	1.033	0.88	-0.1533	-0.3726 to 0.06594
		2	1.007	0.6667	-0.34	-0.5593 to -0.1207
		3	1.007	0.5017	-0.505	-0.7243 to -0.2857
		4	1.033	0.22	-0.8133	-1.033 to -0.5941
		5	1.007	0.1467	-0.86	-1.079 to -0.6407
		6	0.98	0.1117	-0.8683	-1.088 to -0.6491
		7	1.007	0.1117	-0.895	-1.114 to -0.6757
		Column Factor	Difference	t	P value	Summary
		0	0	0	P > 0.05	ns
		1	-0.1533	2.336	P > 0.05	ns
		2	-0.34	5.179	P<0.001	***
		3	-0.505	7.693	P<0.001	***
		4	-0.8133	12.39	P<0.001	***
		5	-0.86	13.1	P<0.001	***
		6	-0.8683	13.23	P<0.001	***
		7	-0.895	13.63	P<0.001	***
		TNBS vs TNBS+EA
		Column Factor	TNBS	TNBS+EA	Difference	95% CI of diff.
		0	1.033	1.06	0.02667	-0.1926 to 0.2459
		1	0.8867	0.9567	0.07	-0.1493 to 0.2893
		2	0.7633	0.73	-0.03333	-0.2526 to 0.1859
		3	0.5283	0.5	-0.02833	-0.2476 to 0.1909
		4	0.3167	0.535	0.2183	-0.0009378 to 0.4376
		5	0.16	0.73	0.57	0.3507 to 0.7893
		6	0.1117	0.8467	0.735	0.5157 to 0.9543
		7	0.08833	0.9217	0.8333	0.6141 to 1.053
		Column Factor	Difference	t	P value	Summary
		0	0.02667	0.4062	P > 0.05	ns
		1	0.07	1.066	P > 0.05	ns
		2	-0.03333	0.5078	P > 0.05	ns
		3	-0.02833	0.4316	P > 0.05	ns
		4	0.2183	3.326	P<0.01	**
		5	0.57	8.683	P<0.001	***
		6	0.735	11.2	P<0.001	***
		7	0.8333	12.69	P<0.001	***
		TNBS vs TNBS+shamEA
		Column Factor	TNBS	TNBS+shamEA	Difference	95% CI of diff.
		0	1.033	1.033	0	-0.2193 to 0.2193
		1	0.8867	0.88	-0.006667	-0.2259 to 0.2126
		2	0.7633	0.6667	-0.09667	-0.3159 to 0.1226
		3	0.5283	0.5017	-0.02667	-0.2459 to 0.1926
		4	0.3167	0.22	-0.09667	-0.3159 to 0.1226
		5	0.16	0.1467	-0.01333	-0.2326 to 0.2059
		6	0.1117	0.1117	0	-0.2193 to 0.2193
		7	0.08833	0.1117	0.02333	-0.1959 to 0.2426
		Column Factor	Difference	t	P value	Summary
		0	0	0	P > 0.05	ns
		1	-0.006667	0.1016	P > 0.05	ns
		2	-0.09667	1.473	P > 0.05	ns
		3	-0.02667	0.4062	P > 0.05	ns
		4	-0.09667	1.473	P > 0.05	ns
		5	-0.01333	0.2031	P > 0.05	ns
		6	0	0	P > 0.05	ns
		7	0.02333	0.3554	P > 0.05	ns
		TNBS+EA vs TNBS+shamEA
		Column Factor	TNBS+EA	TNBS+shamEA	Difference	95% CI of diff.
		0	1.06	1.033	-0.02667	-0.2459 to 0.1926
		1	0.9567	0.88	-0.07667	-0.2959 to 0.1426
		2	0.73	0.6667	-0.06333	-0.2826 to 0.1559
		3	0.5	0.5017	0.001667	-0.2176 to 0.2209
		4	0.535	0.22	-0.315	-0.5343 to -0.09573
		5	0.73	0.1467	-0.5833	-0.8026 to -0.3641
		6	0.8467	0.1117	-0.735	-0.9543 to -0.5157
		7	0.9217	0.1117	-0.81	-1.029 to -0.5907
		Column Factor	Difference	t	P value	Summary
		0	-0.02667	0.4062	P > 0.05	ns
		1	-0.07667	1.168	P > 0.05	ns
		2	-0.06333	0.9648	P > 0.05	ns
		3	0.001667	0.02539	P > 0.05	ns
		4	-0.315	4.799	P<0.001	***
		5	-0.5833	8.886	P<0.001	***
		6	-0.735	11.2	P<0.001	***
		7	-0.81	12.34	P<0.001	***

## Sheet: C57 visceral pain
mmHg	Control						TNBS						TNBS+EA						TNBS+shamEA
20	0	0	1	1	1	0	1	1	1	1	2	2	1	1	0	0	1	1	1	0	2	2	1	2
40	0	1	1	1	1	0	2	2	1	2	2	2	1	1	1	1	1	2	2	1	2	2	2	2
60	1	1	1	2	2	1	3	2	2	3	3	3	1	2	2	2	1	2	3	2	3	3	3	3
80	2	1	2	3	2	2	4	4	3	4	4	4	2	3	3	2	2	3	3	3	4	4	4	4
		Parameter
		Table Analyzed	C57 mechanical allodynia
		Two-way RM ANOVA	Matching by cols
		Source of Variation	% of total variation	P value
		Interaction	22.48	< 0.0001
		Time	29.75	< 0.0001
		Column Factor	39.59	< 0.0001
		Subjects (matching)	3.8447	< 0.0001
		Source of Variation	P value summary	Significant?
		Interaction	***	Yes
		Time	***	Yes
		Column Factor	***	Yes
		Subjects (matching)	***	Yes
		Source of Variation	Df	Sum-of-squares	Mean square	F
		Interaction	21	5.681	0.2705	34.53
		Time	7	7.518	1.074	137.1
		Column Factor	3	10.01	3.336	68.65
		Subjects (matching)	20	0.9717	0.04859	6.202
		Residual	140	1.097	0.007834
		Number of missing values	0
		Bonferroni posttests
		Control vs TNBS
		Column Factor	Control	TNBS	Difference	95% CI of diff.
		0	1.033	1.033	0	-0.2193 to 0.2193
		1	1.033	0.8867	-0.1467	-0.3659 to 0.07260
		2	1.007	0.7633	-0.2433	-0.4626 to -0.02406
		3	1.007	0.5283	-0.4783	-0.6976 to -0.2591
		4	1.033	0.3167	-0.7167	-0.9359 to -0.4974
		5	1.007	0.16	-0.8467	-1.066 to -0.6274
		6	0.98	0.1117	-0.8683	-1.088 to -0.6491
		7	1.007	0.08833	-0.9183	-1.138 to -0.6991
		Column Factor	Difference	t	P value	Summary
		0	0	0	P > 0.05	ns
		1	-0.1467	2.234	P > 0.05	ns
		2	-0.2433	3.707	P<0.01	**
		3	-0.4783	7.287	P<0.001	***
		4	-0.7167	10.92	P<0.001	***
		5	-0.8467	12.9	P<0.001	***
		6	-0.8683	13.23	P<0.001	***
		7	-0.9183	13.99	P<0.001	***
		Control vs TNBS+EA
		Column Factor	Control	TNBS+EA	Difference	95% CI of diff.
		0	1.033	1.06	0.02667	-0.1926 to 0.2459
		1	1.033	0.9567	-0.07667	-0.2959 to 0.1426
		2	1.007	0.73	-0.2767	-0.4959 to -0.05740
		3	1.007	0.5	-0.5067	-0.7259 to -0.2874
		4	1.033	0.535	-0.4983	-0.7176 to -0.2791
		5	1.007	0.73	-0.2767	-0.4959 to -0.05740
		6	0.98	0.8467	-0.1333	-0.3526 to 0.08594
		7	1.007	0.9217	-0.085	-0.3043 to 0.1343
		Column Factor	Difference	t	P value	Summary
		0	0.02667	0.4062	P > 0.05	ns
		1	-0.07667	1.168	P > 0.05	ns
		2	-0.2767	4.215	P<0.001	***
		3	-0.5067	7.718	P<0.001	***
		4	-0.4983	7.591	P<0.001	***
		5	-0.2767	4.215	P<0.001	***
		6	-0.1333	2.031	P > 0.05	ns
		7	-0.085	1.295	P > 0.05	ns
		Control vs TNBS+shamEA
		Column Factor	Control	TNBS+shamEA	Difference	95% CI of diff.
		0	1.033	1.033	0	-0.2193 to 0.2193
		1	1.033	0.88	-0.1533	-0.3726 to 0.06594
		2	1.007	0.6667	-0.34	-0.5593 to -0.1207
		3	1.007	0.5017	-0.505	-0.7243 to -0.2857
		4	1.033	0.22	-0.8133	-1.033 to -0.5941
		5	1.007	0.1467	-0.86	-1.079 to -0.6407
		6	0.98	0.1117	-0.8683	-1.088 to -0.6491
		7	1.007	0.1117	-0.895	-1.114 to -0.6757
		Column Factor	Difference	t	P value	Summary
		0	0	0	P > 0.05	ns
		1	-0.1533	2.336	P > 0.05	ns
		2	-0.34	5.179	P<0.001	***
		3	-0.505	7.693	P<0.001	***
		4	-0.8133	12.39	P<0.001	***
		5	-0.86	13.1	P<0.001	***
		6	-0.8683	13.23	P<0.001	***
		7	-0.895	13.63	P<0.001	***
		TNBS vs TNBS+EA
		Column Factor	TNBS	TNBS+EA	Difference	95% CI of diff.
		0	1.033	1.06	0.02667	-0.1926 to 0.2459
		1	0.8867	0.9567	0.07	-0.1493 to 0.2893
		2	0.7633	0.73	-0.03333	-0.2526 to 0.1859
		3	0.5283	0.5	-0.02833	-0.2476 to 0.1909
		4	0.3167	0.535	0.2183	-0.0009378 to 0.4376
		5	0.16	0.73	0.57	0.3507 to 0.7893
		6	0.1117	0.8467	0.735	0.5157 to 0.9543
		7	0.08833	0.9217	0.8333	0.6141 to 1.053
		Column Factor	Difference	t	P value	Summary
		0	0.02667	0.4062	P > 0.05	ns
		1	0.07	1.066	P > 0.05	ns
		2	-0.03333	0.5078	P > 0.05	ns
		3	-0.02833	0.4316	P > 0.05	ns
		4	0.2183	3.326	P<0.01	**
		5	0.57	8.683	P<0.001	***
		6	0.735	11.2	P<0.001	***
		7	0.8333	12.69	P<0.001	***
		TNBS vs TNBS+shamEA
		Column Factor	TNBS	TNBS+shamEA	Difference	95% CI of diff.
		0	1.033	1.033	0	-0.2193 to 0.2193
		1	0.8867	0.88	-0.006667	-0.2259 to 0.2126
		2	0.7633	0.6667	-0.09667	-0.3159 to 0.1226
		3	0.5283	0.5017	-0.02667	-0.2459 to 0.1926
		4	0.3167	0.22	-0.09667	-0.3159 to 0.1226
		5	0.16	0.1467	-0.01333	-0.2326 to 0.2059
		6	0.1117	0.1117	0	-0.2193 to 0.2193
		7	0.08833	0.1117	0.02333	-0.1959 to 0.2426
		Column Factor	Difference	t	P value	Summary
		0	0	0	P > 0.05	ns
		1	-0.006667	0.1016	P > 0.05	ns
		2	-0.09667	1.473	P > 0.05	ns
		3	-0.02667	0.4062	P > 0.05	ns
		4	-0.09667	1.473	P > 0.05	ns
		5	-0.01333	0.2031	P > 0.05	ns
		6	0	0	P > 0.05	ns
		7	0.02333	0.3554	P > 0.05	ns
		TNBS+EA vs TNBS+shamEA
		Column Factor	TNBS+EA	TNBS+shamEA	Difference	95% CI of diff.
		0	1.06	1.033	-0.02667	-0.2459 to 0.1926
		1	0.9567	0.88	-0.07667	-0.2959 to 0.1426
		2	0.73	0.6667	-0.06333	-0.2826 to 0.1559
		3	0.5	0.5017	0.001667	-0.2176 to 0.2209
		4	0.535	0.22	-0.315	-0.5343 to -0.09573
		5	0.73	0.1467	-0.5833	-0.8026 to -0.3641
		6	0.8467	0.1117	-0.735	-0.9543 to -0.5157
		7	0.9217	0.1117	-0.81	-1.029 to -0.5907
		Column Factor	Difference	t	P value	Summary
		0	-0.02667	0.4062	P > 0.05	ns
		1	-0.07667	1.168	P > 0.05	ns
		2	-0.06333	0.9648	P > 0.05	ns
		3	0.001667	0.02539	P > 0.05	ns
		4	-0.315	4.799	P<0.001	***
		5	-0.5833	8.886	P<0.001	***
		6	-0.735	11.2	P<0.001	***
		7	-0.81	12.34	P<0.001	***

## Sheet: C57 HE 
	Control	TNBS	TNBS+EA	TNBS+shamEA
	0	8	2	7
	1	9	2	9
	2	7	3	6
	1	6	2	8
	2	7	3	8
	1	8	3	7
	Parameter
	Table Analyzed	C57 mechanical allodynia
	Two-way RM ANOVA	Matching by cols
	Source of Variation	% of total variation	P value
	Interaction	22.48	< 0.0001
	Time	29.75	< 0.0001
	Column Factor	39.59	< 0.0001
	Subjects (matching)	3.8447	< 0.0001
	Source of Variation	P value summary	Significant?
	Interaction	***	Yes
	Time	***	Yes
	Column Factor	***	Yes
	Subjects (matching)	***	Yes
	Source of Variation	Df	Sum-of-squares	Mean square	F
	Interaction	21	5.681	0.2705	34.53
	Time	7	7.518	1.074	137.1
	Column Factor	3	10.01	3.336	68.65
	Subjects (matching)	20	0.9717	0.04859	6.202
	Residual	140	1.097	0.007834
	Number of missing values	0
	Bonferroni posttests
	Control vs TNBS
	Column Factor	Control	TNBS	Difference	95% CI of diff.
	0	1.033	1.033	0	-0.2193 to 0.2193
	1	1.033	0.8867	-0.1467	-0.3659 to 0.07260
	2	1.007	0.7633	-0.2433	-0.4626 to -0.02406
	3	1.007	0.5283	-0.4783	-0.6976 to -0.2591
	4	1.033	0.3167	-0.7167	-0.9359 to -0.4974
	5	1.007	0.16	-0.8467	-1.066 to -0.6274
	6	0.98	0.1117	-0.8683	-1.088 to -0.6491
	7	1.007	0.08833	-0.9183	-1.138 to -0.6991
	Column Factor	Difference	t	P value	Summary
	0	0	0	P > 0.05	ns
	1	-0.1467	2.234	P > 0.05	ns
	2	-0.2433	3.707	P<0.01	**
	3	-0.4783	7.287	P<0.001	***
	4	-0.7167	10.92	P<0.001	***
	5	-0.8467	12.9	P<0.001	***
	6	-0.8683	13.23	P<0.001	***
	7	-0.9183	13.99	P<0.001	***
	Control vs TNBS+EA
	Column Factor	Control	TNBS+EA	Difference	95% CI of diff.
	0	1.033	1.06	0.02667	-0.1926 to 0.2459
	1	1.033	0.9567	-0.07667	-0.2959 to 0.1426
	2	1.007	0.73	-0.2767	-0.4959 to -0.05740
	3	1.007	0.5	-0.5067	-0.7259 to -0.2874
	4	1.033	0.535	-0.4983	-0.7176 to -0.2791
	5	1.007	0.73	-0.2767	-0.4959 to -0.05740
	6	0.98	0.8467	-0.1333	-0.3526 to 0.08594
	7	1.007	0.9217	-0.085	-0.3043 to 0.1343
	Column Factor	Difference	t	P value	Summary
	0	0.02667	0.4062	P > 0.05	ns
	1	-0.07667	1.168	P > 0.05	ns
	2	-0.2767	4.215	P<0.001	***
	3	-0.5067	7.718	P<0.001	***
	4	-0.4983	7.591	P<0.001	***
	5	-0.2767	4.215	P<0.001	***
	6	-0.1333	2.031	P > 0.05	ns
	7	-0.085	1.295	P > 0.05	ns
	Control vs TNBS+shamEA
	Column Factor	Control	TNBS+shamEA	Difference	95% CI of diff.
	0	1.033	1.033	0	-0.2193 to 0.2193
	1	1.033	0.88	-0.1533	-0.3726 to 0.06594
	2	1.007	0.6667	-0.34	-0.5593 to -0.1207
	3	1.007	0.5017	-0.505	-0.7243 to -0.2857
	4	1.033	0.22	-0.8133	-1.033 to -0.5941
	5	1.007	0.1467	-0.86	-1.079 to -0.6407
	6	0.98	0.1117	-0.8683	-1.088 to -0.6491
	7	1.007	0.1117	-0.895	-1.114 to -0.6757
	Column Factor	Difference	t	P value	Summary
	0	0	0	P > 0.05	ns
	1	-0.1533	2.336	P > 0.05	ns
	2	-0.34	5.179	P<0.001	***
	3	-0.505	7.693	P<0.001	***
	4	-0.8133	12.39	P<0.001	***
	5	-0.86	13.1	P<0.001	***
	6	-0.8683	13.23	P<0.001	***
	7	-0.895	13.63	P<0.001	***
	TNBS vs TNBS+EA
	Column Factor	TNBS	TNBS+EA	Difference	95% CI of diff.
	0	1.033	1.06	0.02667	-0.1926 to 0.2459
	1	0.8867	0.9567	0.07	-0.1493 to 0.2893
	2	0.7633	0.73	-0.03333	-0.2526 to 0.1859
	3	0.5283	0.5	-0.02833	-0.2476 to 0.1909
	4	0.3167	0.535	0.2183	-0.0009378 to 0.4376
	5	0.16	0.73	0.57	0.3507 to 0.7893
	6	0.1117	0.8467	0.735	0.5157 to 0.9543
	7	0.08833	0.9217	0.8333	0.6141 to 1.053
	Column Factor	Difference	t	P value	Summary
	0	0.02667	0.4062	P > 0.05	ns
	1	0.07	1.066	P > 0.05	ns
	2	-0.03333	0.5078	P > 0.05	ns
	3	-0.02833	0.4316	P > 0.05	ns
	4	0.2183	3.326	P<0.01	**
	5	0.57	8.683	P<0.001	***
	6	0.735	11.2	P<0.001	***
	7	0.8333	12.69	P<0.001	***
	TNBS vs TNBS+shamEA
	Column Factor	TNBS	TNBS+shamEA	Difference	95% CI of diff.
	0	1.033	1.033	0	-0.2193 to 0.2193
	1	0.8867	0.88	-0.006667	-0.2259 to 0.2126
	2	0.7633	0.6667	-0.09667	-0.3159 to 0.1226
	3	0.5283	0.5017	-0.02667	-0.2459 to 0.1926
	4	0.3167	0.22	-0.09667	-0.3159 to 0.1226
	5	0.16	0.1467	-0.01333	-0.2326 to 0.2059
	6	0.1117	0.1117	0	-0.2193 to 0.2193
	7	0.08833	0.1117	0.02333	-0.1959 to 0.2426
	Column Factor	Difference	t	P value	Summary
	0	0	0	P > 0.05	ns
	1	-0.006667	0.1016	P > 0.05	ns
	2	-0.09667	1.473	P > 0.05	ns
	3	-0.02667	0.4062	P > 0.05	ns
	4	-0.09667	1.473	P > 0.05	ns
	5	-0.01333	0.2031	P > 0.05	ns
	6	0	0	P > 0.05	ns
	7	0.02333	0.3554	P > 0.05	ns
	TNBS+EA vs TNBS+shamEA
	Column Factor	TNBS+EA	TNBS+shamEA	Difference	95% CI of diff.
	0	1.06	1.033	-0.02667	-0.2459 to 0.1926
	1	0.9567	0.88	-0.07667	-0.2959 to 0.1426
	2	0.73	0.6667	-0.06333	-0.2826 to 0.1559
	3	0.5	0.5017	0.001667	-0.2176 to 0.2209
	4	0.535	0.22	-0.315	-0.5343 to -0.09573
	5	0.73	0.1467	-0.5833	-0.8026 to -0.3641
	6	0.8467	0.1117	-0.735	-0.9543 to -0.5157
	7	0.9217	0.1117	-0.81	-1.029 to -0.5907
	Column Factor	Difference	t	P value	Summary
	0	-0.02667	0.4062	P > 0.05	ns
	1	-0.07667	1.168	P > 0.05	ns
	2	-0.06333	0.9648	P > 0.05	ns
	3	0.001667	0.02539	P > 0.05	ns
	4	-0.315	4.799	P<0.001	***
	5	-0.5833	8.886	P<0.001	***
	6	-0.735	11.2	P<0.001	***
	7	-0.81	12.34	P<0.001	***

## Sheet: C57 IL-1β WB
Control	TNBS	TNBS+EA	TNBS+shamEA
136.399	258.126	158.531	188.315
59.4244	193.254	94.2342	216.856
104.177	274.211	144.762	308.198
	Parameter
	Table Analyzed	C57 mechanical allodynia
	Two-way RM ANOVA	Matching by cols
	Source of Variation	% of total variation	P value
	Interaction	22.48	< 0.0001
	Time	29.75	< 0.0001
	Column Factor	39.59	< 0.0001
	Subjects (matching)	3.8447	< 0.0001
	Source of Variation	P value summary	Significant?
	Interaction	***	Yes
	Time	***	Yes
	Column Factor	***	Yes
	Subjects (matching)	***	Yes
	Source of Variation	Df	Sum-of-squares	Mean square	F
	Interaction	21	5.681	0.2705	34.53
	Time	7	7.518	1.074	137.1
	Column Factor	3	10.01	3.336	68.65
	Subjects (matching)	20	0.9717	0.04859	6.202
	Residual	140	1.097	0.007834
	Number of missing values	0
	Bonferroni posttests
	Control vs TNBS
	Column Factor	Control	TNBS	Difference	95% CI of diff.
	0	1.033	1.033	0	-0.2193 to 0.2193
	1	1.033	0.8867	-0.1467	-0.3659 to 0.07260
	2	1.007	0.7633	-0.2433	-0.4626 to -0.02406
	3	1.007	0.5283	-0.4783	-0.6976 to -0.2591
	4	1.033	0.3167	-0.7167	-0.9359 to -0.4974
	5	1.007	0.16	-0.8467	-1.066 to -0.6274
	6	0.98	0.1117	-0.8683	-1.088 to -0.6491
	7	1.007	0.08833	-0.9183	-1.138 to -0.6991
	Column Factor	Difference	t	P value	Summary
	0	0	0	P > 0.05	ns
	1	-0.1467	2.234	P > 0.05	ns
	2	-0.2433	3.707	P<0.01	**
	3	-0.4783	7.287	P<0.001	***
	4	-0.7167	10.92	P<0.001	***
	5	-0.8467	12.9	P<0.001	***
	6	-0.8683	13.23	P<0.001	***
	7	-0.9183	13.99	P<0.001	***
	Control vs TNBS+EA
	Column Factor	Control	TNBS+EA	Difference	95% CI of diff.
	0	1.033	1.06	0.02667	-0.1926 to 0.2459
	1	1.033	0.9567	-0.07667	-0.2959 to 0.1426
	2	1.007	0.73	-0.2767	-0.4959 to -0.05740
	3	1.007	0.5	-0.5067	-0.7259 to -0.2874
	4	1.033	0.535	-0.4983	-0.7176 to -0.2791
	5	1.007	0.73	-0.2767	-0.4959 to -0.05740
	6	0.98	0.8467	-0.1333	-0.3526 to 0.08594
	7	1.007	0.9217	-0.085	-0.3043 to 0.1343
	Column Factor	Difference	t	P value	Summary
	0	0.02667	0.4062	P > 0.05	ns
	1	-0.07667	1.168	P > 0.05	ns
	2	-0.2767	4.215	P<0.001	***
	3	-0.5067	7.718	P<0.001	***
	4	-0.4983	7.591	P<0.001	***
	5	-0.2767	4.215	P<0.001	***
	6	-0.1333	2.031	P > 0.05	ns
	7	-0.085	1.295	P > 0.05	ns
	Control vs TNBS+shamEA
	Column Factor	Control	TNBS+shamEA	Difference	95% CI of diff.
	0	1.033	1.033	0	-0.2193 to 0.2193
	1	1.033	0.88	-0.1533	-0.3726 to 0.06594
	2	1.007	0.6667	-0.34	-0.5593 to -0.1207
	3	1.007	0.5017	-0.505	-0.7243 to -0.2857
	4	1.033	0.22	-0.8133	-1.033 to -0.5941
	5	1.007	0.1467	-0.86	-1.079 to -0.6407
	6	0.98	0.1117	-0.8683	-1.088 to -0.6491
	7	1.007	0.1117	-0.895	-1.114 to -0.6757
	Column Factor	Difference	t	P value	Summary
	0	0	0	P > 0.05	ns
	1	-0.1533	2.336	P > 0.05	ns
	2	-0.34	5.179	P<0.001	***
	3	-0.505	7.693	P<0.001	***
	4	-0.8133	12.39	P<0.001	***
	5	-0.86	13.1	P<0.001	***
	6	-0.8683	13.23	P<0.001	***
	7	-0.895	13.63	P<0.001	***
	TNBS vs TNBS+EA
	Column Factor	TNBS	TNBS+EA	Difference	95% CI of diff.
	0	1.033	1.06	0.02667	-0.1926 to 0.2459
	1	0.8867	0.9567	0.07	-0.1493 to 0.2893
	2	0.7633	0.73	-0.03333	-0.2526 to 0.1859
	3	0.5283	0.5	-0.02833	-0.2476 to 0.1909
	4	0.3167	0.535	0.2183	-0.0009378 to 0.4376
	5	0.16	0.73	0.57	0.3507 to 0.7893
	6	0.1117	0.8467	0.735	0.5157 to 0.9543
	7	0.08833	0.9217	0.8333	0.6141 to 1.053
	Column Factor	Difference	t	P value	Summary
	0	0.02667	0.4062	P > 0.05	ns
	1	0.07	1.066	P > 0.05	ns
	2	-0.03333	0.5078	P > 0.05	ns
	3	-0.02833	0.4316	P > 0.05	ns
	4	0.2183	3.326	P<0.01	**
	5	0.57	8.683	P<0.001	***
	6	0.735	11.2	P<0.001	***
	7	0.8333	12.69	P<0.001	***
	TNBS vs TNBS+shamEA
	Column Factor	TNBS	TNBS+shamEA	Difference	95% CI of diff.
	0	1.033	1.033	0	-0.2193 to 0.2193
	1	0.8867	0.88	-0.006667	-0.2259 to 0.2126
	2	0.7633	0.6667	-0.09667	-0.3159 to 0.1226
	3	0.5283	0.5017	-0.02667	-0.2459 to 0.1926
	4	0.3167	0.22	-0.09667	-0.3159 to 0.1226
	5	0.16	0.1467	-0.01333	-0.2326 to 0.2059
	6	0.1117	0.1117	0	-0.2193 to 0.2193
	7	0.08833	0.1117	0.02333	-0.1959 to 0.2426
	Column Factor	Difference	t	P value	Summary
	0	0	0	P > 0.05	ns
	1	-0.006667	0.1016	P > 0.05	ns
	2	-0.09667	1.473	P > 0.05	ns
	3	-0.02667	0.4062	P > 0.05	ns
	4	-0.09667	1.473	P > 0.05	ns
	5	-0.01333	0.2031	P > 0.05	ns
	6	0	0	P > 0.05	ns
	7	0.02333	0.3554	P > 0.05	ns
	TNBS+EA vs TNBS+shamEA
	Column Factor	TNBS+EA	TNBS+shamEA	Difference	95% CI of diff.
	0	1.06	1.033	-0.02667	-0.2459 to 0.1926
	1	0.9567	0.88	-0.07667	-0.2959 to 0.1426
	2	0.73	0.6667	-0.06333	-0.2826 to 0.1559
	3	0.5	0.5017	0.001667	-0.2176 to 0.2209
	4	0.535	0.22	-0.315	-0.5343 to -0.09573
	5	0.73	0.1467	-0.5833	-0.8026 to -0.3641
	6	0.8467	0.1117	-0.735	-0.9543 to -0.5157
	7	0.9217	0.1117	-0.81	-1.029 to -0.5907
	Column Factor	Difference	t	P value	Summary
	0	-0.02667	0.4062	P > 0.05	ns
	1	-0.07667	1.168	P > 0.05	ns
	2	-0.06333	0.9648	P > 0.05	ns
	3	0.001667	0.02539	P > 0.05	ns
	4	-0.315	4.799	P<0.001	***
	5	-0.5833	8.886	P<0.001	***
	6	-0.735	11.2	P<0.001	***
	7	-0.81	12.34	P<0.001	***

## Sheet: C57 iNOS WB
Control	TNBS	TNBS+EA	TNBS+shamEA
93.9213	218.831	137.084	443.561
94.4004	344.498	144.422	282.221
111.678	249.062	161.436	236.839
			Parameter
			Table Analyzed	C57 mechanical allodynia
			Two-way RM ANOVA	Matching by cols
			Source of Variation	% of total variation	P value
			Interaction	22.48	< 0.0001
			Time	29.75	< 0.0001
			Column Factor	39.59	< 0.0001
			Subjects (matching)	3.8447	< 0.0001
			Source of Variation	P value summary	Significant?
			Interaction	***	Yes
			Time	***	Yes
			Column Factor	***	Yes
			Subjects (matching)	***	Yes
			Source of Variation	Df	Sum-of-squares	Mean square	F
			Interaction	21	5.681	0.2705	34.53
			Time	7	7.518	1.074	137.1
			Column Factor	3	10.01	3.336	68.65
			Subjects (matching)	20	0.9717	0.04859	6.202
			Residual	140	1.097	0.007834
			Number of missing values	0
			Bonferroni posttests
			Control vs TNBS
			Column Factor	Control	TNBS	Difference	95% CI of diff.
			0	1.033	1.033	0	-0.2193 to 0.2193
			1	1.033	0.8867	-0.1467	-0.3659 to 0.07260
			2	1.007	0.7633	-0.2433	-0.4626 to -0.02406
			3	1.007	0.5283	-0.4783	-0.6976 to -0.2591
			4	1.033	0.3167	-0.7167	-0.9359 to -0.4974
			5	1.007	0.16	-0.8467	-1.066 to -0.6274
			6	0.98	0.1117	-0.8683	-1.088 to -0.6491
			7	1.007	0.08833	-0.9183	-1.138 to -0.6991
			Column Factor	Difference	t	P value	Summary
			0	0	0	P > 0.05	ns
			1	-0.1467	2.234	P > 0.05	ns
			2	-0.2433	3.707	P<0.01	**
			3	-0.4783	7.287	P<0.001	***
			4	-0.7167	10.92	P<0.001	***
			5	-0.8467	12.9	P<0.001	***
			6	-0.8683	13.23	P<0.001	***
			7	-0.9183	13.99	P<0.001	***
			Control vs TNBS+EA
			Column Factor	Control	TNBS+EA	Difference	95% CI of diff.
			0	1.033	1.06	0.02667	-0.1926 to 0.2459
			1	1.033	0.9567	-0.07667	-0.2959 to 0.1426
			2	1.007	0.73	-0.2767	-0.4959 to -0.05740
			3	1.007	0.5	-0.5067	-0.7259 to -0.2874
			4	1.033	0.535	-0.4983	-0.7176 to -0.2791
			5	1.007	0.73	-0.2767	-0.4959 to -0.05740
			6	0.98	0.8467	-0.1333	-0.3526 to 0.08594
			7	1.007	0.9217	-0.085	-0.3043 to 0.1343
			Column Factor	Difference	t	P value	Summary
			0	0.02667	0.4062	P > 0.05	ns
			1	-0.07667	1.168	P > 0.05	ns
			2	-0.2767	4.215	P<0.001	***
			3	-0.5067	7.718	P<0.001	***
			4	-0.4983	7.591	P<0.001	***
			5	-0.2767	4.215	P<0.001	***
			6	-0.1333	2.031	P > 0.05	ns
			7	-0.085	1.295	P > 0.05	ns
			Control vs TNBS+shamEA
			Column Factor	Control	TNBS+shamEA	Difference	95% CI of diff.
			0	1.033	1.033	0	-0.2193 to 0.2193
			1	1.033	0.88	-0.1533	-0.3726 to 0.06594
			2	1.007	0.6667	-0.34	-0.5593 to -0.1207
			3	1.007	0.5017	-0.505	-0.7243 to -0.2857
			4	1.033	0.22	-0.8133	-1.033 to -0.5941
			5	1.007	0.1467	-0.86	-1.079 to -0.6407
			6	0.98	0.1117	-0.8683	-1.088 to -0.6491
			7	1.007	0.1117	-0.895	-1.114 to -0.6757
			Column Factor	Difference	t	P value	Summary
			0	0	0	P > 0.05	ns
			1	-0.1533	2.336	P > 0.05	ns
			2	-0.34	5.179	P<0.001	***
			3	-0.505	7.693	P<0.001	***
			4	-0.8133	12.39	P<0.001	***
			5	-0.86	13.1	P<0.001	***
			6	-0.8683	13.23	P<0.001	***
			7	-0.895	13.63	P<0.001	***
			TNBS vs TNBS+EA
			Column Factor	TNBS	TNBS+EA	Difference	95% CI of diff.
			0	1.033	1.06	0.02667	-0.1926 to 0.2459
			1	0.8867	0.9567	0.07	-0.1493 to 0.2893
			2	0.7633	0.73	-0.03333	-0.2526 to 0.1859
			3	0.5283	0.5	-0.02833	-0.2476 to 0.1909
			4	0.3167	0.535	0.2183	-0.0009378 to 0.4376
			5	0.16	0.73	0.57	0.3507 to 0.7893
			6	0.1117	0.8467	0.735	0.5157 to 0.9543
			7	0.08833	0.9217	0.8333	0.6141 to 1.053
			Column Factor	Difference	t	P value	Summary
			0	0.02667	0.4062	P > 0.05	ns
			1	0.07	1.066	P > 0.05	ns
			2	-0.03333	0.5078	P > 0.05	ns
			3	-0.02833	0.4316	P > 0.05	ns
			4	0.2183	3.326	P<0.01	**
			5	0.57	8.683	P<0.001	***
			6	0.735	11.2	P<0.001	***
			7	0.8333	12.69	P<0.001	***
			TNBS vs TNBS+shamEA
			Column Factor	TNBS	TNBS+shamEA	Difference	95% CI of diff.
			0	1.033	1.033	0	-0.2193 to 0.2193
			1	0.8867	0.88	-0.006667	-0.2259 to 0.2126
			2	0.7633	0.6667	-0.09667	-0.3159 to 0.1226
			3	0.5283	0.5017	-0.02667	-0.2459 to 0.1926
			4	0.3167	0.22	-0.09667	-0.3159 to 0.1226
			5	0.16	0.1467	-0.01333	-0.2326 to 0.2059
			6	0.1117	0.1117	0	-0.2193 to 0.2193
			7	0.08833	0.1117	0.02333	-0.1959 to 0.2426
			Column Factor	Difference	t	P value	Summary
			0	0	0	P > 0.05	ns
			1	-0.006667	0.1016	P > 0.05	ns
			2	-0.09667	1.473	P > 0.05	ns
			3	-0.02667	0.4062	P > 0.05	ns
			4	-0.09667	1.473	P > 0.05	ns
			5	-0.01333	0.2031	P > 0.05	ns
			6	0	0	P > 0.05	ns
			7	0.02333	0.3554	P > 0.05	ns
			TNBS+EA vs TNBS+shamEA
			Column Factor	TNBS+EA	TNBS+shamEA	Difference	95% CI of diff.
			0	1.06	1.033	-0.02667	-0.2459 to 0.1926
			1	0.9567	0.88	-0.07667	-0.2959 to 0.1426
			2	0.73	0.6667	-0.06333	-0.2826 to 0.1559
			3	0.5	0.5017	0.001667	-0.2176 to 0.2209
			4	0.535	0.22	-0.315	-0.5343 to -0.09573
			5	0.73	0.1467	-0.5833	-0.8026 to -0.3641
			6	0.8467	0.1117	-0.735	-0.9543 to -0.5157
			7	0.9217	0.1117	-0.81	-1.029 to -0.5907
			Column Factor	Difference	t	P value	Summary
			0	-0.02667	0.4062	P > 0.05	ns
			1	-0.07667	1.168	P > 0.05	ns
			2	-0.06333	0.9648	P > 0.05	ns
			3	0.001667	0.02539	P > 0.05	ns
			4	-0.315	4.799	P<0.001	***
			5	-0.5833	8.886	P<0.001	***
			6	-0.735	11.2	P<0.001	***
			7	-0.81	12.34	P<0.001	***

## Sheet: C57 iNOS IF
Control	TNBS	TNBS+EA	TNBS+shamEA
125	375	225	350
75	366.667	133.333	375
100	400	216.667	400
			Parameter
			Table Analyzed	C57 mechanical allodynia
			Two-way RM ANOVA	Matching by cols
			Source of Variation	% of total variation	P value
			Interaction	22.48	< 0.0001
			Time	29.75	< 0.0001
			Column Factor	39.59	< 0.0001
			Subjects (matching)	3.8447	< 0.0001
			Source of Variation	P value summary	Significant?
			Interaction	***	Yes
			Time	***	Yes
			Column Factor	***	Yes
			Subjects (matching)	***	Yes
			Source of Variation	Df	Sum-of-squares	Mean square	F
			Interaction	21	5.681	0.2705	34.53
			Time	7	7.518	1.074	137.1
			Column Factor	3	10.01	3.336	68.65
			Subjects (matching)	20	0.9717	0.04859	6.202
			Residual	140	1.097	0.007834
			Number of missing values	0
			Bonferroni posttests
			Control vs TNBS
			Column Factor	Control	TNBS	Difference	95% CI of diff.
			0	1.033	1.033	0	-0.2193 to 0.2193
			1	1.033	0.8867	-0.1467	-0.3659 to 0.07260
			2	1.007	0.7633	-0.2433	-0.4626 to -0.02406
			3	1.007	0.5283	-0.4783	-0.6976 to -0.2591
			4	1.033	0.3167	-0.7167	-0.9359 to -0.4974
			5	1.007	0.16	-0.8467	-1.066 to -0.6274
			6	0.98	0.1117	-0.8683	-1.088 to -0.6491
			7	1.007	0.08833	-0.9183	-1.138 to -0.6991
			Column Factor	Difference	t	P value	Summary
			0	0	0	P > 0.05	ns
			1	-0.1467	2.234	P > 0.05	ns
			2	-0.2433	3.707	P<0.01	**
			3	-0.4783	7.287	P<0.001	***
			4	-0.7167	10.92	P<0.001	***
			5	-0.8467	12.9	P<0.001	***
			6	-0.8683	13.23	P<0.001	***
			7	-0.9183	13.99	P<0.001	***
			Control vs TNBS+EA
			Column Factor	Control	TNBS+EA	Difference	95% CI of diff.
			0	1.033	1.06	0.02667	-0.1926 to 0.2459
			1	1.033	0.9567	-0.07667	-0.2959 to 0.1426
			2	1.007	0.73	-0.2767	-0.4959 to -0.05740
			3	1.007	0.5	-0.5067	-0.7259 to -0.2874
			4	1.033	0.535	-0.4983	-0.7176 to -0.2791
			5	1.007	0.73	-0.2767	-0.4959 to -0.05740
			6	0.98	0.8467	-0.1333	-0.3526 to 0.08594
			7	1.007	0.9217	-0.085	-0.3043 to 0.1343
			Column Factor	Difference	t	P value	Summary
			0	0.02667	0.4062	P > 0.05	ns
			1	-0.07667	1.168	P > 0.05	ns
			2	-0.2767	4.215	P<0.001	***
			3	-0.5067	7.718	P<0.001	***
			4	-0.4983	7.591	P<0.001	***
			5	-0.2767	4.215	P<0.001	***
			6	-0.1333	2.031	P > 0.05	ns
			7	-0.085	1.295	P > 0.05	ns
			Control vs TNBS+shamEA
			Column Factor	Control	TNBS+shamEA	Difference	95% CI of diff.
			0	1.033	1.033	0	-0.2193 to 0.2193
			1	1.033	0.88	-0.1533	-0.3726 to 0.06594
			2	1.007	0.6667	-0.34	-0.5593 to -0.1207
			3	1.007	0.5017	-0.505	-0.7243 to -0.2857
			4	1.033	0.22	-0.8133	-1.033 to -0.5941
			5	1.007	0.1467	-0.86	-1.079 to -0.6407
			6	0.98	0.1117	-0.8683	-1.088 to -0.6491
			7	1.007	0.1117	-0.895	-1.114 to -0.6757
			Column Factor	Difference	t	P value	Summary
			0	0	0	P > 0.05	ns
			1	-0.1533	2.336	P > 0.05	ns
			2	-0.34	5.179	P<0.001	***
			3	-0.505	7.693	P<0.001	***
			4	-0.8133	12.39	P<0.001	***
			5	-0.86	13.1	P<0.001	***
			6	-0.8683	13.23	P<0.001	***
			7	-0.895	13.63	P<0.001	***
			TNBS vs TNBS+EA
			Column Factor	TNBS	TNBS+EA	Difference	95% CI of diff.
			0	1.033	1.06	0.02667	-0.1926 to 0.2459
			1	0.8867	0.9567	0.07	-0.1493 to 0.2893
			2	0.7633	0.73	-0.03333	-0.2526 to 0.1859
			3	0.5283	0.5	-0.02833	-0.2476 to 0.1909
			4	0.3167	0.535	0.2183	-0.0009378 to 0.4376
			5	0.16	0.73	0.57	0.3507 to 0.7893
			6	0.1117	0.8467	0.735	0.5157 to 0.9543
			7	0.08833	0.9217	0.8333	0.6141 to 1.053
			Column Factor	Difference	t	P value	Summary
			0	0.02667	0.4062	P > 0.05	ns
			1	0.07	1.066	P > 0.05	ns
			2	-0.03333	0.5078	P > 0.05	ns
			3	-0.02833	0.4316	P > 0.05	ns
			4	0.2183	3.326	P<0.01	**
			5	0.57	8.683	P<0.001	***
			6	0.735	11.2	P<0.001	***
			7	0.8333	12.69	P<0.001	***
			TNBS vs TNBS+shamEA
			Column Factor	TNBS	TNBS+shamEA	Difference	95% CI of diff.
			0	1.033	1.033	0	-0.2193 to 0.2193
			1	0.8867	0.88	-0.006667	-0.2259 to 0.2126
			2	0.7633	0.6667	-0.09667	-0.3159 to 0.1226
			3	0.5283	0.5017	-0.02667	-0.2459 to 0.1926
			4	0.3167	0.22	-0.09667	-0.3159 to 0.1226
			5	0.16	0.1467	-0.01333	-0.2326 to 0.2059
			6	0.1117	0.1117	0	-0.2193 to 0.2193
			7	0.08833	0.1117	0.02333	-0.1959 to 0.2426
			Column Factor	Difference	t	P value	Summary
			0	0	0	P > 0.05	ns
			1	-0.006667	0.1016	P > 0.05	ns
			2	-0.09667	1.473	P > 0.05	ns
			3	-0.02667	0.4062	P > 0.05	ns
			4	-0.09667	1.473	P > 0.05	ns
			5	-0.01333	0.2031	P > 0.05	ns
			6	0	0	P > 0.05	ns
			7	0.02333	0.3554	P > 0.05	ns
			TNBS+EA vs TNBS+shamEA
			Column Factor	TNBS+EA	TNBS+shamEA	Difference	95% CI of diff.
			0	1.06	1.033	-0.02667	-0.2459 to 0.1926
			1	0.9567	0.88	-0.07667	-0.2959 to 0.1426
			2	0.73	0.6667	-0.06333	-0.2826 to 0.1559
			3	0.5	0.5017	0.001667	-0.2176 to 0.2209
			4	0.535	0.22	-0.315	-0.5343 to -0.09573
			5	0.73	0.1467	-0.5833	-0.8026 to -0.3641
			6	0.8467	0.1117	-0.735	-0.9543 to -0.5157
			7	0.9217	0.1117	-0.81	-1.029 to -0.5907
			Column Factor	Difference	t	P value	Summary
			0	-0.02667	0.4062	P > 0.05	ns
			1	-0.07667	1.168	P > 0.05	ns
			2	-0.06333	0.9648	P > 0.05	ns
			3	0.001667	0.02539	P > 0.05	ns
			4	-0.315	4.799	P<0.001	***
			5	-0.5833	8.886	P<0.001	***
			6	-0.735	11.2	P<0.001	***
			7	-0.81	12.34	P<0.001	***

## Sheet: C57 CB2 receptor WB
Control	TNBS	TNBS+EA	TNBS+shamEA
63.181	123.758	199.143	147.131
96.0122	137.702	177.895	137.173
133.257	153.245	210.808	147.484
			Parameter
			Table Analyzed	C57 mechanical allodynia
			Two-way RM ANOVA	Matching by cols
			Source of Variation	% of total variation	P value
			Interaction	22.48	< 0.0001
			Time	29.75	< 0.0001
			Column Factor	39.59	< 0.0001
			Subjects (matching)	3.8447	< 0.0001
			Source of Variation	P value summary	Significant?
			Interaction	***	Yes
			Time	***	Yes
			Column Factor	***	Yes
			Subjects (matching)	***	Yes
			Source of Variation	Df	Sum-of-squares	Mean square	F
			Interaction	21	5.681	0.2705	34.53
			Time	7	7.518	1.074	137.1
			Column Factor	3	10.01	3.336	68.65
			Subjects (matching)	20	0.9717	0.04859	6.202
			Residual	140	1.097	0.007834
			Number of missing values	0
			Bonferroni posttests
			Control vs TNBS
			Column Factor	Control	TNBS	Difference	95% CI of diff.
			0	1.033	1.033	0	-0.2193 to 0.2193
			1	1.033	0.8867	-0.1467	-0.3659 to 0.07260
			2	1.007	0.7633	-0.2433	-0.4626 to -0.02406
			3	1.007	0.5283	-0.4783	-0.6976 to -0.2591
			4	1.033	0.3167	-0.7167	-0.9359 to -0.4974
			5	1.007	0.16	-0.8467	-1.066 to -0.6274
			6	0.98	0.1117	-0.8683	-1.088 to -0.6491
			7	1.007	0.08833	-0.9183	-1.138 to -0.6991
			Column Factor	Difference	t	P value	Summary
			0	0	0	P > 0.05	ns
			1	-0.1467	2.234	P > 0.05	ns
			2	-0.2433	3.707	P<0.01	**
			3	-0.4783	7.287	P<0.001	***
			4	-0.7167	10.92	P<0.001	***
			5	-0.8467	12.9	P<0.001	***
			6	-0.8683	13.23	P<0.001	***
			7	-0.9183	13.99	P<0.001	***
			Control vs TNBS+EA
			Column Factor	Control	TNBS+EA	Difference	95% CI of diff.
			0	1.033	1.06	0.02667	-0.1926 to 0.2459
			1	1.033	0.9567	-0.07667	-0.2959 to 0.1426
			2	1.007	0.73	-0.2767	-0.4959 to -0.05740
			3	1.007	0.5	-0.5067	-0.7259 to -0.2874
			4	1.033	0.535	-0.4983	-0.7176 to -0.2791
			5	1.007	0.73	-0.2767	-0.4959 to -0.05740
			6	0.98	0.8467	-0.1333	-0.3526 to 0.08594
			7	1.007	0.9217	-0.085	-0.3043 to 0.1343
			Column Factor	Difference	t	P value	Summary
			0	0.02667	0.4062	P > 0.05	ns
			1	-0.07667	1.168	P > 0.05	ns
			2	-0.2767	4.215	P<0.001	***
			3	-0.5067	7.718	P<0.001	***
			4	-0.4983	7.591	P<0.001	***
			5	-0.2767	4.215	P<0.001	***
			6	-0.1333	2.031	P > 0.05	ns
			7	-0.085	1.295	P > 0.05	ns
			Control vs TNBS+shamEA
			Column Factor	Control	TNBS+shamEA	Difference	95% CI of diff.
			0	1.033	1.033	0	-0.2193 to 0.2193
			1	1.033	0.88	-0.1533	-0.3726 to 0.06594
			2	1.007	0.6667	-0.34	-0.5593 to -0.1207
			3	1.007	0.5017	-0.505	-0.7243 to -0.2857
			4	1.033	0.22	-0.8133	-1.033 to -0.5941
			5	1.007	0.1467	-0.86	-1.079 to -0.6407
			6	0.98	0.1117	-0.8683	-1.088 to -0.6491
			7	1.007	0.1117	-0.895	-1.114 to -0.6757
			Column Factor	Difference	t	P value	Summary
			0	0	0	P > 0.05	ns
			1	-0.1533	2.336	P > 0.05	ns
			2	-0.34	5.179	P<0.001	***
			3	-0.505	7.693	P<0.001	***
			4	-0.8133	12.39	P<0.001	***
			5	-0.86	13.1	P<0.001	***
			6	-0.8683	13.23	P<0.001	***
			7	-0.895	13.63	P<0.001	***
			TNBS vs TNBS+EA
			Column Factor	TNBS	TNBS+EA	Difference	95% CI of diff.
			0	1.033	1.06	0.02667	-0.1926 to 0.2459
			1	0.8867	0.9567	0.07	-0.1493 to 0.2893
			2	0.7633	0.73	-0.03333	-0.2526 to 0.1859
			3	0.5283	0.5	-0.02833	-0.2476 to 0.1909
			4	0.3167	0.535	0.2183	-0.0009378 to 0.4376
			5	0.16	0.73	0.57	0.3507 to 0.7893
			6	0.1117	0.8467	0.735	0.5157 to 0.9543
			7	0.08833	0.9217	0.8333	0.6141 to 1.053
			Column Factor	Difference	t	P value	Summary
			0	0.02667	0.4062	P > 0.05	ns
			1	0.07	1.066	P > 0.05	ns
			2	-0.03333	0.5078	P > 0.05	ns
			3	-0.02833	0.4316	P > 0.05	ns
			4	0.2183	3.326	P<0.01	**
			5	0.57	8.683	P<0.001	***
			6	0.735	11.2	P<0.001	***
			7	0.8333	12.69	P<0.001	***
			TNBS vs TNBS+shamEA
			Column Factor	TNBS	TNBS+shamEA	Difference	95% CI of diff.
			0	1.033	1.033	0	-0.2193 to 0.2193
			1	0.8867	0.88	-0.006667	-0.2259 to 0.2126
			2	0.7633	0.6667	-0.09667	-0.3159 to 0.1226
			3	0.5283	0.5017	-0.02667	-0.2459 to 0.1926
			4	0.3167	0.22	-0.09667	-0.3159 to 0.1226
			5	0.16	0.1467	-0.01333	-0.2326 to 0.2059
			6	0.1117	0.1117	0	-0.2193 to 0.2193
			7	0.08833	0.1117	0.02333	-0.1959 to 0.2426
			Column Factor	Difference	t	P value	Summary
			0	0	0	P > 0.05	ns
			1	-0.006667	0.1016	P > 0.05	ns
			2	-0.09667	1.473	P > 0.05	ns
			3	-0.02667	0.4062	P > 0.05	ns
			4	-0.09667	1.473	P > 0.05	ns
			5	-0.01333	0.2031	P > 0.05	ns
			6	0	0	P > 0.05	ns
			7	0.02333	0.3554	P > 0.05	ns
			TNBS+EA vs TNBS+shamEA
			Column Factor	TNBS+EA	TNBS+shamEA	Difference	95% CI of diff.
			0	1.06	1.033	-0.02667	-0.2459 to 0.1926
			1	0.9567	0.88	-0.07667	-0.2959 to 0.1426
			2	0.73	0.6667	-0.06333	-0.2826 to 0.1559
			3	0.5	0.5017	0.001667	-0.2176 to 0.2209
			4	0.535	0.22	-0.315	-0.5343 to -0.09573
			5	0.73	0.1467	-0.5833	-0.8026 to -0.3641
			6	0.8467	0.1117	-0.735	-0.9543 to -0.5157
			7	0.9217	0.1117	-0.81	-1.029 to -0.5907
			Column Factor	Difference	t	P value	Summary
			0	-0.02667	0.4062	P > 0.05	ns
			1	-0.07667	1.168	P > 0.05	ns
			2	-0.06333	0.9648	P > 0.05	ns
			3	0.001667	0.02539	P > 0.05	ns
			4	-0.315	4.799	P<0.001	***
			5	-0.5833	8.886	P<0.001	***
			6	-0.735	11.2	P<0.001	***
			7	-0.81	12.34	P<0.001	***

## Sheet: C57 CD68 IF
Control	TNBS	TNBS+EA	TNBS+shamEA
81.4815	329.63	155.556	414.815
92.5926	344.445	148.148	318.519
125.926	288.889	196.296	248.148
		Parameter
		Table Analyzed	C57 mechanical allodynia
		Two-way RM ANOVA	Matching by cols
		Source of Variation	% of total variation	P value
		Interaction	22.48	< 0.0001
		Time	29.75	< 0.0001
		Column Factor	39.59	< 0.0001
		Subjects (matching)	3.8447	< 0.0001
		Source of Variation	P value summary	Significant?
		Interaction	***	Yes
		Time	***	Yes
		Column Factor	***	Yes
		Subjects (matching)	***	Yes
		Source of Variation	Df	Sum-of-squares	Mean square	F
		Interaction	21	5.681	0.2705	34.53
		Time	7	7.518	1.074	137.1
		Column Factor	3	10.01	3.336	68.65
		Subjects (matching)	20	0.9717	0.04859	6.202
		Residual	140	1.097	0.007834
		Number of missing values	0
		Bonferroni posttests
		Control vs TNBS
		Column Factor	Control	TNBS	Difference	95% CI of diff.
		0	1.033	1.033	0	-0.2193 to 0.2193
		1	1.033	0.8867	-0.1467	-0.3659 to 0.07260
		2	1.007	0.7633	-0.2433	-0.4626 to -0.02406
		3	1.007	0.5283	-0.4783	-0.6976 to -0.2591
		4	1.033	0.3167	-0.7167	-0.9359 to -0.4974
		5	1.007	0.16	-0.8467	-1.066 to -0.6274
		6	0.98	0.1117	-0.8683	-1.088 to -0.6491
		7	1.007	0.08833	-0.9183	-1.138 to -0.6991
		Column Factor	Difference	t	P value	Summary
		0	0	0	P > 0.05	ns
		1	-0.1467	2.234	P > 0.05	ns
		2	-0.2433	3.707	P<0.01	**
		3	-0.4783	7.287	P<0.001	***
		4	-0.7167	10.92	P<0.001	***
		5	-0.8467	12.9	P<0.001	***
		6	-0.8683	13.23	P<0.001	***
		7	-0.9183	13.99	P<0.001	***
		Control vs TNBS+EA
		Column Factor	Control	TNBS+EA	Difference	95% CI of diff.
		0	1.033	1.06	0.02667	-0.1926 to 0.2459
		1	1.033	0.9567	-0.07667	-0.2959 to 0.1426
		2	1.007	0.73	-0.2767	-0.4959 to -0.05740
		3	1.007	0.5	-0.5067	-0.7259 to -0.2874
		4	1.033	0.535	-0.4983	-0.7176 to -0.2791
		5	1.007	0.73	-0.2767	-0.4959 to -0.05740
		6	0.98	0.8467	-0.1333	-0.3526 to 0.08594
		7	1.007	0.9217	-0.085	-0.3043 to 0.1343
		Column Factor	Difference	t	P value	Summary
		0	0.02667	0.4062	P > 0.05	ns
		1	-0.07667	1.168	P > 0.05	ns
		2	-0.2767	4.215	P<0.001	***
		3	-0.5067	7.718	P<0.001	***
		4	-0.4983	7.591	P<0.001	***
		5	-0.2767	4.215	P<0.001	***
		6	-0.1333	2.031	P > 0.05	ns
		7	-0.085	1.295	P > 0.05	ns
		Control vs TNBS+shamEA
		Column Factor	Control	TNBS+shamEA	Difference	95% CI of diff.
		0	1.033	1.033	0	-0.2193 to 0.2193
		1	1.033	0.88	-0.1533	-0.3726 to 0.06594
		2	1.007	0.6667	-0.34	-0.5593 to -0.1207
		3	1.007	0.5017	-0.505	-0.7243 to -0.2857
		4	1.033	0.22	-0.8133	-1.033 to -0.5941
		5	1.007	0.1467	-0.86	-1.079 to -0.6407
		6	0.98	0.1117	-0.8683	-1.088 to -0.6491
		7	1.007	0.1117	-0.895	-1.114 to -0.6757
		Column Factor	Difference	t	P value	Summary
		0	0	0	P > 0.05	ns
		1	-0.1533	2.336	P > 0.05	ns
		2	-0.34	5.179	P<0.001	***
		3	-0.505	7.693	P<0.001	***
		4	-0.8133	12.39	P<0.001	***
		5	-0.86	13.1	P<0.001	***
		6	-0.8683	13.23	P<0.001	***
		7	-0.895	13.63	P<0.001	***
		TNBS vs TNBS+EA
		Column Factor	TNBS	TNBS+EA	Difference	95% CI of diff.
		0	1.033	1.06	0.02667	-0.1926 to 0.2459
		1	0.8867	0.9567	0.07	-0.1493 to 0.2893
		2	0.7633	0.73	-0.03333	-0.2526 to 0.1859
		3	0.5283	0.5	-0.02833	-0.2476 to 0.1909
		4	0.3167	0.535	0.2183	-0.0009378 to 0.4376
		5	0.16	0.73	0.57	0.3507 to 0.7893
		6	0.1117	0.8467	0.735	0.5157 to 0.9543
		7	0.08833	0.9217	0.8333	0.6141 to 1.053
		Column Factor	Difference	t	P value	Summary
		0	0.02667	0.4062	P > 0.05	ns
		1	0.07	1.066	P > 0.05	ns
		2	-0.03333	0.5078	P > 0.05	ns
		3	-0.02833	0.4316	P > 0.05	ns
		4	0.2183	3.326	P<0.01	**
		5	0.57	8.683	P<0.001	***
		6	0.735	11.2	P<0.001	***
		7	0.8333	12.69	P<0.001	***
		TNBS vs TNBS+shamEA
		Column Factor	TNBS	TNBS+shamEA	Difference	95% CI of diff.
		0	1.033	1.033	0	-0.2193 to 0.2193
		1	0.8867	0.88	-0.006667	-0.2259 to 0.2126
		2	0.7633	0.6667	-0.09667	-0.3159 to 0.1226
		3	0.5283	0.5017	-0.02667	-0.2459 to 0.1926
		4	0.3167	0.22	-0.09667	-0.3159 to 0.1226
		5	0.16	0.1467	-0.01333	-0.2326 to 0.2059
		6	0.1117	0.1117	0	-0.2193 to 0.2193
		7	0.08833	0.1117	0.02333	-0.1959 to 0.2426
		Column Factor	Difference	t	P value	Summary
		0	0	0	P > 0.05	ns
		1	-0.006667	0.1016	P > 0.05	ns
		2	-0.09667	1.473	P > 0.05	ns
		3	-0.02667	0.4062	P > 0.05	ns
		4	-0.09667	1.473	P > 0.05	ns
		5	-0.01333	0.2031	P > 0.05	ns
		6	0	0	P > 0.05	ns
		7	0.02333	0.3554	P > 0.05	ns
		TNBS+EA vs TNBS+shamEA
		Column Factor	TNBS+EA	TNBS+shamEA	Difference	95% CI of diff.
		0	1.06	1.033	-0.02667	-0.2459 to 0.1926
		1	0.9567	0.88	-0.07667	-0.2959 to 0.1426
		2	0.73	0.6667	-0.06333	-0.2826 to 0.1559
		3	0.5	0.5017	0.001667	-0.2176 to 0.2209
		4	0.535	0.22	-0.315	-0.5343 to -0.09573
		5	0.73	0.1467	-0.5833	-0.8026 to -0.3641
		6	0.8467	0.1117	-0.735	-0.9543 to -0.5157
		7	0.9217	0.1117	-0.81	-1.029 to -0.5907
		Column Factor	Difference	t	P value	Summary
		0	-0.02667	0.4062	P > 0.05	ns
		1	-0.07667	1.168	P > 0.05	ns
		2	-0.06333	0.9648	P > 0.05	ns
		3	0.001667	0.02539	P > 0.05	ns
		4	-0.315	4.799	P<0.001	***
		5	-0.5833	8.886	P<0.001	***
		6	-0.735	11.2	P<0.001	***
		7	-0.81	12.34	P<0.001	***

## Sheet: C57 CB2 IF
Control	TNBS	TNBS+EA	TNBS+shamEA
73.7705	137.705	245.902	152.459
93.4426	162.295	378.688	177.049
132.787	245.902	521.312	309.836
			Parameter
			Table Analyzed	C57 mechanical allodynia
			Two-way RM ANOVA	Matching by cols
			Source of Variation	% of total variation	P value
			Interaction	22.48	< 0.0001
			Time	29.75	< 0.0001
			Column Factor	39.59	< 0.0001
			Subjects (matching)	3.8447	< 0.0001
			Source of Variation	P value summary	Significant?
			Interaction	***	Yes
			Time	***	Yes
			Column Factor	***	Yes
			Subjects (matching)	***	Yes
			Source of Variation	Df	Sum-of-squares	Mean square	F
			Interaction	21	5.681	0.2705	34.53
			Time	7	7.518	1.074	137.1
			Column Factor	3	10.01	3.336	68.65
			Subjects (matching)	20	0.9717	0.04859	6.202
			Residual	140	1.097	0.007834
			Number of missing values	0
			Bonferroni posttests
			Control vs TNBS
			Column Factor	Control	TNBS	Difference	95% CI of diff.
			0	1.033	1.033	0	-0.2193 to 0.2193
			1	1.033	0.8867	-0.1467	-0.3659 to 0.07260
			2	1.007	0.7633	-0.2433	-0.4626 to -0.02406
			3	1.007	0.5283	-0.4783	-0.6976 to -0.2591
			4	1.033	0.3167	-0.7167	-0.9359 to -0.4974
			5	1.007	0.16	-0.8467	-1.066 to -0.6274
			6	0.98	0.1117	-0.8683	-1.088 to -0.6491
			7	1.007	0.08833	-0.9183	-1.138 to -0.6991
			Column Factor	Difference	t	P value	Summary
			0	0	0	P > 0.05	ns
			1	-0.1467	2.234	P > 0.05	ns
			2	-0.2433	3.707	P<0.01	**
			3	-0.4783	7.287	P<0.001	***
			4	-0.7167	10.92	P<0.001	***
			5	-0.8467	12.9	P<0.001	***
			6	-0.8683	13.23	P<0.001	***
			7	-0.9183	13.99	P<0.001	***
			Control vs TNBS+EA
			Column Factor	Control	TNBS+EA	Difference	95% CI of diff.
			0	1.033	1.06	0.02667	-0.1926 to 0.2459
			1	1.033	0.9567	-0.07667	-0.2959 to 0.1426
			2	1.007	0.73	-0.2767	-0.4959 to -0.05740
			3	1.007	0.5	-0.5067	-0.7259 to -0.2874
			4	1.033	0.535	-0.4983	-0.7176 to -0.2791
			5	1.007	0.73	-0.2767	-0.4959 to -0.05740
			6	0.98	0.8467	-0.1333	-0.3526 to 0.08594
			7	1.007	0.9217	-0.085	-0.3043 to 0.1343
			Column Factor	Difference	t	P value	Summary
			0	0.02667	0.4062	P > 0.05	ns
			1	-0.07667	1.168	P > 0.05	ns
			2	-0.2767	4.215	P<0.001	***
			3	-0.5067	7.718	P<0.001	***
			4	-0.4983	7.591	P<0.001	***
			5	-0.2767	4.215	P<0.001	***
			6	-0.1333	2.031	P > 0.05	ns
			7	-0.085	1.295	P > 0.05	ns
			Control vs TNBS+shamEA
			Column Factor	Control	TNBS+shamEA	Difference	95% CI of diff.
			0	1.033	1.033	0	-0.2193 to 0.2193
			1	1.033	0.88	-0.1533	-0.3726 to 0.06594
			2	1.007	0.6667	-0.34	-0.5593 to -0.1207
			3	1.007	0.5017	-0.505	-0.7243 to -0.2857
			4	1.033	0.22	-0.8133	-1.033 to -0.5941
			5	1.007	0.1467	-0.86	-1.079 to -0.6407
			6	0.98	0.1117	-0.8683	-1.088 to -0.6491
			7	1.007	0.1117	-0.895	-1.114 to -0.6757
			Column Factor	Difference	t	P value	Summary
			0	0	0	P > 0.05	ns
			1	-0.1533	2.336	P > 0.05	ns
			2	-0.34	5.179	P<0.001	***
			3	-0.505	7.693	P<0.001	***
			4	-0.8133	12.39	P<0.001	***
			5	-0.86	13.1	P<0.001	***
			6	-0.8683	13.23	P<0.001	***
			7	-0.895	13.63	P<0.001	***
			TNBS vs TNBS+EA
			Column Factor	TNBS	TNBS+EA	Difference	95% CI of diff.
			0	1.033	1.06	0.02667	-0.1926 to 0.2459
			1	0.8867	0.9567	0.07	-0.1493 to 0.2893
			2	0.7633	0.73	-0.03333	-0.2526 to 0.1859
			3	0.5283	0.5	-0.02833	-0.2476 to 0.1909
			4	0.3167	0.535	0.2183	-0.0009378 to 0.4376
			5	0.16	0.73	0.57	0.3507 to 0.7893
			6	0.1117	0.8467	0.735	0.5157 to 0.9543
			7	0.08833	0.9217	0.8333	0.6141 to 1.053
			Column Factor	Difference	t	P value	Summary
			0	0.02667	0.4062	P > 0.05	ns
			1	0.07	1.066	P > 0.05	ns
			2	-0.03333	0.5078	P > 0.05	ns
			3	-0.02833	0.4316	P > 0.05	ns
			4	0.2183	3.326	P<0.01	**
			5	0.57	8.683	P<0.001	***
			6	0.735	11.2	P<0.001	***
			7	0.8333	12.69	P<0.001	***
			TNBS vs TNBS+shamEA
			Column Factor	TNBS	TNBS+shamEA	Difference	95% CI of diff.
			0	1.033	1.033	0	-0.2193 to 0.2193
			1	0.8867	0.88	-0.006667	-0.2259 to 0.2126
			2	0.7633	0.6667	-0.09667	-0.3159 to 0.1226
			3	0.5283	0.5017	-0.02667	-0.2459 to 0.1926
			4	0.3167	0.22	-0.09667	-0.3159 to 0.1226
			5	0.16	0.1467	-0.01333	-0.2326 to 0.2059
			6	0.1117	0.1117	0	-0.2193 to 0.2193
			7	0.08833	0.1117	0.02333	-0.1959 to 0.2426
			Column Factor	Difference	t	P value	Summary
			0	0	0	P > 0.05	ns
			1	-0.006667	0.1016	P > 0.05	ns
			2	-0.09667	1.473	P > 0.05	ns
			3	-0.02667	0.4062	P > 0.05	ns
			4	-0.09667	1.473	P > 0.05	ns
			5	-0.01333	0.2031	P > 0.05	ns
			6	0	0	P > 0.05	ns
			7	0.02333	0.3554	P > 0.05	ns
			TNBS+EA vs TNBS+shamEA
			Column Factor	TNBS+EA	TNBS+shamEA	Difference	95% CI of diff.
			0	1.06	1.033	-0.02667	-0.2459 to 0.1926
			1	0.9567	0.88	-0.07667	-0.2959 to 0.1426
			2	0.73	0.6667	-0.06333	-0.2826 to 0.1559
			3	0.5	0.5017	0.001667	-0.2176 to 0.2209
			4	0.535	0.22	-0.315	-0.5343 to -0.09573
			5	0.73	0.1467	-0.5833	-0.8026 to -0.3641
			6	0.8467	0.1117	-0.735	-0.9543 to -0.5157
			7	0.9217	0.1117	-0.81	-1.029 to -0.5907
			Column Factor	Difference	t	P value	Summary
			0	-0.02667	0.4062	P > 0.05	ns
			1	-0.07667	1.168	P > 0.05	ns
			2	-0.06333	0.9648	P > 0.05	ns
			3	0.001667	0.02539	P > 0.05	ns
			4	-0.315	4.799	P<0.001	***
			5	-0.5833	8.886	P<0.001	***
			6	-0.735	11.2	P<0.001	***
			7	-0.81	12.34	P<0.001	***

## Sheet: C57 CD68+CB2 IF
Control	TNBS	TNBS+EA	TNBS+shamEA
87.0968	125.806	309.677	174.194
96.7742	145.161	280.645	135.484
116.129	174.194	251.613	125.806
				Parameter
				Table Analyzed	C57 mechanical allodynia
				Two-way RM ANOVA	Matching by cols
				Source of Variation	% of total variation	P value
				Interaction	22.48	< 0.0001
				Time	29.75	< 0.0001
				Column Factor	39.59	< 0.0001
				Subjects (matching)	3.8447	< 0.0001
				Source of Variation	P value summary	Significant?
				Interaction	***	Yes
				Time	***	Yes
				Column Factor	***	Yes
				Subjects (matching)	***	Yes
				Source of Variation	Df	Sum-of-squares	Mean square	F
				Interaction	21	5.681	0.2705	34.53
				Time	7	7.518	1.074	137.1
				Column Factor	3	10.01	3.336	68.65
				Subjects (matching)	20	0.9717	0.04859	6.202
				Residual	140	1.097	0.007834
				Number of missing values	0
				Bonferroni posttests
				Control vs TNBS
				Column Factor	Control	TNBS	Difference	95% CI of diff.
				0	1.033	1.033	0	-0.2193 to 0.2193
				1	1.033	0.8867	-0.1467	-0.3659 to 0.07260
				2	1.007	0.7633	-0.2433	-0.4626 to -0.02406
				3	1.007	0.5283	-0.4783	-0.6976 to -0.2591
				4	1.033	0.3167	-0.7167	-0.9359 to -0.4974
				5	1.007	0.16	-0.8467	-1.066 to -0.6274
				6	0.98	0.1117	-0.8683	-1.088 to -0.6491
				7	1.007	0.08833	-0.9183	-1.138 to -0.6991
				Column Factor	Difference	t	P value	Summary
				0	0	0	P > 0.05	ns
				1	-0.1467	2.234	P > 0.05	ns
				2	-0.2433	3.707	P<0.01	**
				3	-0.4783	7.287	P<0.001	***
				4	-0.7167	10.92	P<0.001	***
				5	-0.8467	12.9	P<0.001	***
				6	-0.8683	13.23	P<0.001	***
				7	-0.9183	13.99	P<0.001	***
				Control vs TNBS+EA
				Column Factor	Control	TNBS+EA	Difference	95% CI of diff.
				0	1.033	1.06	0.02667	-0.1926 to 0.2459
				1	1.033	0.9567	-0.07667	-0.2959 to 0.1426
				2	1.007	0.73	-0.2767	-0.4959 to -0.05740
				3	1.007	0.5	-0.5067	-0.7259 to -0.2874
				4	1.033	0.535	-0.4983	-0.7176 to -0.2791
				5	1.007	0.73	-0.2767	-0.4959 to -0.05740
				6	0.98	0.8467	-0.1333	-0.3526 to 0.08594
				7	1.007	0.9217	-0.085	-0.3043 to 0.1343
				Column Factor	Difference	t	P value	Summary
				0	0.02667	0.4062	P > 0.05	ns
				1	-0.07667	1.168	P > 0.05	ns
				2	-0.2767	4.215	P<0.001	***
				3	-0.5067	7.718	P<0.001	***
				4	-0.4983	7.591	P<0.001	***
				5	-0.2767	4.215	P<0.001	***
				6	-0.1333	2.031	P > 0.05	ns
				7	-0.085	1.295	P > 0.05	ns
				Control vs TNBS+shamEA
				Column Factor	Control	TNBS+shamEA	Difference	95% CI of diff.
				0	1.033	1.033	0	-0.2193 to 0.2193
				1	1.033	0.88	-0.1533	-0.3726 to 0.06594
				2	1.007	0.6667	-0.34	-0.5593 to -0.1207
				3	1.007	0.5017	-0.505	-0.7243 to -0.2857
				4	1.033	0.22	-0.8133	-1.033 to -0.5941
				5	1.007	0.1467	-0.86	-1.079 to -0.6407
				6	0.98	0.1117	-0.8683	-1.088 to -0.6491
				7	1.007	0.1117	-0.895	-1.114 to -0.6757
				Column Factor	Difference	t	P value	Summary
				0	0	0	P > 0.05	ns
				1	-0.1533	2.336	P > 0.05	ns
				2	-0.34	5.179	P<0.001	***
				3	-0.505	7.693	P<0.001	***
				4	-0.8133	12.39	P<0.001	***
				5	-0.86	13.1	P<0.001	***
				6	-0.8683	13.23	P<0.001	***
				7	-0.895	13.63	P<0.001	***
				TNBS vs TNBS+EA
				Column Factor	TNBS	TNBS+EA	Difference	95% CI of diff.
				0	1.033	1.06	0.02667	-0.1926 to 0.2459
				1	0.8867	0.9567	0.07	-0.1493 to 0.2893
				2	0.7633	0.73	-0.03333	-0.2526 to 0.1859
				3	0.5283	0.5	-0.02833	-0.2476 to 0.1909
				4	0.3167	0.535	0.2183	-0.0009378 to 0.4376
				5	0.16	0.73	0.57	0.3507 to 0.7893
				6	0.1117	0.8467	0.735	0.5157 to 0.9543
				7	0.08833	0.9217	0.8333	0.6141 to 1.053
				Column Factor	Difference	t	P value	Summary
				0	0.02667	0.4062	P > 0.05	ns
				1	0.07	1.066	P > 0.05	ns
				2	-0.03333	0.5078	P > 0.05	ns
				3	-0.02833	0.4316	P > 0.05	ns
				4	0.2183	3.326	P<0.01	**
				5	0.57	8.683	P<0.001	***
				6	0.735	11.2	P<0.001	***
				7	0.8333	12.69	P<0.001	***
				TNBS vs TNBS+shamEA
				Column Factor	TNBS	TNBS+shamEA	Difference	95% CI of diff.
				0	1.033	1.033	0	-0.2193 to 0.2193
				1	0.8867	0.88	-0.006667	-0.2259 to 0.2126
				2	0.7633	0.6667	-0.09667	-0.3159 to 0.1226
				3	0.5283	0.5017	-0.02667	-0.2459 to 0.1926
				4	0.3167	0.22	-0.09667	-0.3159 to 0.1226
				5	0.16	0.1467	-0.01333	-0.2326 to 0.2059
				6	0.1117	0.1117	0	-0.2193 to 0.2193
				7	0.08833	0.1117	0.02333	-0.1959 to 0.2426
				Column Factor	Difference	t	P value	Summary
				0	0	0	P > 0.05	ns
				1	-0.006667	0.1016	P > 0.05	ns
				2	-0.09667	1.473	P > 0.05	ns
				3	-0.02667	0.4062	P > 0.05	ns
				4	-0.09667	1.473	P > 0.05	ns
				5	-0.01333	0.2031	P > 0.05	ns
				6	0	0	P > 0.05	ns
				7	0.02333	0.3554	P > 0.05	ns
				TNBS+EA vs TNBS+shamEA
				Column Factor	TNBS+EA	TNBS+shamEA	Difference	95% CI of diff.
				0	1.06	1.033	-0.02667	-0.2459 to 0.1926
				1	0.9567	0.88	-0.07667	-0.2959 to 0.1426
				2	0.73	0.6667	-0.06333	-0.2826 to 0.1559
				3	0.5	0.5017	0.001667	-0.2176 to 0.2209
				4	0.535	0.22	-0.315	-0.5343 to -0.09573
				5	0.73	0.1467	-0.5833	-0.8026 to -0.3641
				6	0.8467	0.1117	-0.735	-0.9543 to -0.5157
				7	0.9217	0.1117	-0.81	-1.029 to -0.5907
				Column Factor	Difference	t	P value	Summary
				0	-0.02667	0.4062	P > 0.05	ns
				1	-0.07667	1.168	P > 0.05	ns
				2	-0.06333	0.9648	P > 0.05	ns
				3	0.001667	0.02539	P > 0.05	ns
				4	-0.315	4.799	P<0.001	***
				5	-0.5833	8.886	P<0.001	***
				6	-0.735	11.2	P<0.001	***
				7	-0.81	12.34	P<0.001	***
